# Supplementary material for: Ionic liquids from a fragmented perspective
Source: Royal Society of Chemistry journal article supplement (doi:10.1039/c9cp02836f), 2019-01-01
Supplement: c9cp02836f1.pdf [file c9cp02836f1.pdf]

Supporting Information for

**Ionic liquids from a fragmented perspective**

Justin A. Conrad, Shinae Kim, and Mark S. Gordon

Department of Chemistry, Iowa State University, Ames, IA 50014

- S1. Mean absolute differences and standard deviations of EFP Polarization energy terms relative to SAPT2+3 energy**
- S2. Mean absolute differences and standard deviations of EFP Exchange Repulsion energy terms relative to SAPT2+3 energy**
- S3. Mean absolute differences and standard deviations of EFP Exchange Repulsion energy terms relative to SAPT2+3 energy**
- S4. Mean absolute differences and standard deviations of EFP Dispersion energy terms relative to SAPT2+3 energy**
- S5. EFP Interaction Energies of CnMIM cation and TILA anion using canonical molecular orbitals with 6-311++G(3df2p) basis set**
- S6. EFP Interaction Energies of CnMIM cation and TILA anion VVO Approximation with 6-311++G(3df2p) basis set**
- S7. EFP Interaction Energies of CnMIM cation and halide anion using canonical molecular orbitals with 6-311++G(3df2p) basis set**
- S8. EFP Interaction Energies of CnMIM cation and halide anion using VVO Approximation with 6-311++G(3df2p) basis set**
- S9. EFP Interaction Energies of CnMIM cation and TILA anion using canonical molecular orbitals with 6-311++G(d,p) basis set**
- S10. EFP Interaction Energies of CnMIM cation and TILA anion using Valance Virtual Orbital (VVO) Approximation with 6-311++G(d,p) basis set**

- S11. EFP Interaction Energies of CnMIM cation and halide anion using canonical molecular orbitals with 6-311++G(d,p) basis set**
- S12. EFP Interaction Energies of CnMIM cation and halide anion using VVO Approximation with 6-311++G(d,p) basis set**
- S13. EFP Interaction Energies of N-alkyl-N-methylpyrodidinium (CnPyr) cation and TILA anion using canonical molecular orbitals with 6-311++G(3df2p) basis set**
- S14. EFP Interaction Energies of CnPyr cation and TILA anion using VVO Approximation with 6-311++G(3df2p) basis set**
- S15. EFP Interaction Energies of CnPyr cation and halide anion using canonical molecular orbitals with 6-311++G(3df2p) basis set**
- S16. EFP Interaction Energies of CnPyr cation and halide anion using VVO Approximation with 6-311++G(3df2p) basis set**
- S17. EFP Interaction Energies of N-alkyl-N-methylpyrodidinium (CnPyr) cation and TILA anion using canonical molecular orbitals with 6-311++G(d,p) basis set**
- S18. EFP Interaction Energies of CnPyr cation and TILA anion using VVO Approximation with 6-311++G(d,p) basis set**
- S19. EFP Interaction Energies of CnPyr cation and halide anion using canonical molecular orbitals with 6-311++G(d,p) basis set**
- S20. EFP Interaction Energies of CnPyr cation and halide anion using VVO Approximation with 6-311++G(d,p) basis set**

S1. Mean absolute differences and standard deviations of EFP polarization energy terms relative to SAPT2+3 for >180 ion pair configurations, from reference 24, with four different basis sets for EFP terms, both with and without the valence virtual orbital approximation. Units are in kcal/mol.

|              |        | ACCD <sup>a</sup> |           | ACCT <sup>a</sup> |           | 6-311++G(d,p) |           | 6-311++G(3df,2p) |     |
|--------------|--------|-------------------|-----------|-------------------|-----------|---------------|-----------|------------------|-----|
| Cations      | Anions | CMO               | VVO       | CMO               | VVO       | CMO           | VVO       | CMO              | VVO |
| Polarization | CnMIM  | TILA              | 3.4 ± 1.4 | 3.7 ± 2.1         | 7.9 ± 3.3 | 7.9 ± 3.3     | 5.9 ± 3.1 | 5.9 ± 3.1        |     |
|              |        | TILA-tos          | 3.1 ± 1.4 | 3.4 ± 2.1         | 7.4 ± 3.2 | 7.4 ± 3.2     | 5.3 ± 2.8 | 5.3 ± 2.8        |     |
|              |        | Hal               | 1.6 ± 1.0 | 2.8 ± 4.3         | 1.8 ± 1.3 | 1.8 ± 1.3     | 1.7 ± 1.1 | 1.7 ± 1.1        |     |
|              |        | All               | 2.8 ± 1.5 | 3.4 ± 3.0         | 5.9 ± 4.0 | 5.9 ± 4.0     | 4.5 ± 3.3 | 4.5 ± 3.3        |     |
|              |        | All-tos           | 2.6 ± 1.4 | 3.2 ± 3.1         | 5.4 ± 3.8 | 5.4 ± 3.8     | 4.0 ± 2.9 | 4.0 ± 2.9        |     |
|              | CnMPyr | TILA              | 3.3 ± 1.5 | 3.8 ± 1.8         | 7.2 ± 2.3 | 7.2 ± 2.3     | 5.2 ± 2.1 | 5.2 ± 2.1        |     |
|              |        | TILA-tos          | 3.1 ± 1.5 | 3.7 ± 1.8         | 6.9 ± 2.2 | 6.9 ± 2.2     | 4.9 ± 2.0 | 4.9 ± 2.0        |     |
|              |        | Hal               | 1.2 ± 1.0 | 1.2 ± 0.8         | 1.3 ± 0.8 | 1.3 ± 0.8     | 1.6 ± 2.9 | 1.6 ± 2.9        |     |
|              |        | All               | 2.8 ± 1.7 | 3.2 ± 1.9         | 5.8 ± 3.2 | 5.8 ± 3.2     | 4.3 ± 2.7 | 4.3 ± 2.7        |     |
|              |        | All-tos           | 2.7 ± 1.7 | 3.1 ± 1.9         | 5.5 ± 3.2 | 5.5 ± 3.2     | 4.1 ± 2.7 | 4.1 ± 2.7        |     |
|              | All    | TILA              | 3.3 ± 1.5 | 3.8 ± 1.9         | 7.5 ± 2.8 | 7.5 ± 2.8     | 5.5 ± 2.6 | 5.5 ± 2.6        |     |
|              |        | TILA-tos          | 3.1 ± 1.5 | 3.6 ± 1.9         | 7.1 ± 2.7 | 7.1 ± 2.7     | 5.1 ± 2.4 | 5.1 ± 2.4        |     |
|              |        | Hal               | 1.4 ± 1.0 | 2.1 ± 3.3         | 1.5 ± 1.1 | 1.5 ± 1.1     | 1.7 ± 2.1 | 1.7 ± 2.1        |     |
|              |        | All               | 2.8 ± 1.6 | 3.3 ± 2.5         | 5.8 ± 3.6 | 5.8 ± 3.6     | 4.4 ± 3.0 | 4.4 ± 3.0        |     |
|              |        | All-tos           | 2.6 ± 1.5 | 3.1 ± 2.5         | 5.5 ± 3.5 | 5.5 ± 3.5     | 4.0 ± 2.8 | 4.0 ± 2.8        |     |

<sup>a</sup>SAPT2+3, EFP/ACCD and EFP/ACCT data taken from reference 24.

S2. Mean absolute differences and standard deviations of EFP Electrostatic energy terms relative to SAPT2+3 for >180 ion pair configurations, from reference 24, with four different basis sets for EFP terms, both with and without the valence virtual orbital approximation. Units are in kcal/mol.

|               |        | ACCD <sup>a</sup> |           | ACCT <sup>a</sup> |            | 6-311++G(d,p) |            | 6-311++G(3df,2p) |     |
|---------------|--------|-------------------|-----------|-------------------|------------|---------------|------------|------------------|-----|
| Cations       | Anions | CMO               | VVO       | CMO               | VVO        | CMO           | VVO        | CMO              | VVO |
| Electrostatic | CnMIM  | TILA              | 3.9 ± 6.4 | 2.2 ± 1.4         | 7.6 ± 17.9 | 7.6 ± 17.9    | 6.3 ± 16.6 | 6.3 ± 16.6       |     |
|               |        | TILA-tos          | 2.4 ± 1.3 | 2.0 ± 1.2         | 1.1 ± 1.2  | 1.1 ± 1.2     | 0.9 ± 0.6  | 0.9 ± 0.6        |     |
|               |        | Hal               | 2.5 ± 1.7 | 2.3 ± 2.2         | 3.3 ± 2.4  | 3.3 ± 2.4     | 2.8 ± 2.3  | 2.8 ± 2.3        |     |
|               |        | All               | 3.4 ± 5.3 | 2.2 ± 1.7         | 6.2 ± 14.8 | 6.2 ± 14.8    | 5.2 ± 13.6 | 5.1 ± 13.6       |     |
|               |        | All-tos           | 2.4 ± 1.4 | 2.1 ± 1.6         | 1.9 ± 2.0  | 1.9 ± 2.0     | 1.6 ± 1.7  | 1.6 ± 1.7        |     |
|               | CnMPyr | TILA              | 2.1 ± 1.8 | 1.1 ± 0.8         | 3.0 ± 6.9  | 3.0 ± 6.9     | 0.8 ± 1.4  | 0.8 ± 1.4        |     |
|               |        | TILA-tos          | 1.9 ± 1.3 | 1.0 ± 0.8         | 0.9 ± 0.7  | 0.9 ± 0.7     | 0.5 ± 0.4  | 0.5 ± 0.4        |     |
|               |        | Hal               | 4.4 ± 1.8 | 2.2 ± 1.1         | 2.2 ± 0.9  | 2.2 ± 0.9     | 2.2 ± 0.9  | 2.2 ± 0.9        |     |
|               |        | All               | 2.7 ± 2.0 | 1.3 ± 1.0         | 2.8 ± 6.1  | 2.8 ± 6.1     | 1.1 ± 1.4  | 1.1 ± 1.4        |     |
|               |        | All-tos           | 2.5 ± 1.8 | 1.3 ± 1.0         | 1.2 ± 1.0  | 1.2 ± 1.0     | 0.9 ± 0.9  | 0.9 ± 0.9        |     |
|               | All    | TILA              | 2.9 ± 4.5 | 1.6 ± 1.2         | 5.0 ± 13.0 | 5.0 ± 13.0    | 3.2 ± 11.2 | 3.2 ± 11.2       |     |
|               |        | TILA-tos          | 2.1 ± 1.3 | 1.4 ± 1.1         | 1.0 ± 1.0  | 1.0 ± 1.0     | 0.7 ± 0.5  | 0.7 ± 0.5        |     |
|               |        | Hal               | 3.3 ± 1.9 | 2.2 ± 1.8         | 2.8 ± 2.0  | 2.8 ± 2.0     | 2.5 ± 1.8  | 2.5 ± 1.8        |     |
|               |        | All               | 3.0 ± 3.9 | 1.7 ± 1.4         | 4.4 ± 11.1 | 4.4 ± 11.1    | 3.0 ± 9.6  | 3.0 ± 9.6        |     |
|               |        | All-tos           | 2.5 ± 1.6 | 1.7 ± 1.4         | 1.5 ± 1.6  | 1.5 ± 1.6     | 1.2 ± 1.4  | 1.2 ± 1.4        |     |

<sup>a</sup>SAPT2+3, EFP/ACCD and EFP/ACCT data taken from reference 24.

S3. Mean absolute differences and standard deviations of EFP Exchange Repulsion energy terms relative to SAPT2+3 for >180 ion pair configurations, from reference 24, with four different basis sets for EFP terms, both with and without the valence virtual orbital approximation. Units are in kcal/mol.

|                    |        | ACCD <sup>a</sup> |           | ACCT <sup>a</sup> |           | 6-311++G(d,p) |           | 6-311++G(3df,2p) |     |
|--------------------|--------|-------------------|-----------|-------------------|-----------|---------------|-----------|------------------|-----|
| Cations            | Anions | CMO               | VVO       | CMO               | VVO       | CMO           | VVO       | CMO              | VVO |
| Exchange-Repulsion | CnMIM  | TILA              | 2.0 ± 0.9 | 1.8 ± 0.8         | 3.0 ± 1.3 | 3.0 ± 1.3     | 2.2 ± 1.9 | 2.2 ± 1.9        |     |
|                    |        | TILA-tos          | 1.9 ± 0.9 | 1.9 ± 0.8         | 2.6 ± 0.8 | 2.6 ± 0.8     | 1.7 ± 0.9 | 1.7 ± 0.9        |     |
|                    |        | Hal               | 2.8 ± 1.7 | 2.9 ± 1.9         | 4.4 ± 3.3 | 4.4 ± 3.3     | 2.6 ± 1.6 | 2.6 ± 1.6        |     |
|                    |        | All               | 2.3 ± 1.3 | 2.1 ± 1.4         | 3.5 ± 2.3 | 3.5 ± 2.3     | 2.3 ± 1.8 | 2.3 ± 1.8        |     |
|                    |        | All-tos           | 2.2 ± 1.3 | 2.3 ± 1.4         | 3.3 ± 2.3 | 3.3 ± 2.3     | 2.0 ± 1.3 | 2.0 ± 1.3        |     |
|                    | CnMPyr | TILA              | 1.9 ± 0.3 | 1.8 ± 0.3         | 2.8 ± 0.6 | 2.8 ± 0.6     | 2.1 ± 0.3 | 2.1 ± 0.3        |     |
|                    |        | TILA-tos          | 1.9 ± 0.4 | 1.9 ± 0.3         | 2.7 ± 0.5 | 2.7 ± 0.5     | 2.1 ± 0.3 | 2.1 ± 0.3        |     |
|                    |        | Hal               | 1.2 ± 0.7 | 0.7 ± 0.6         | 3.2 ± 1.4 | 3.2 ± 1.4     | 1.3 ± 1.0 | 1.3 ± 1.0        |     |
|                    |        | All               | 1.7 ± 0.5 | 1.6 ± 0.6         | 2.9 ± 0.9 | 2.9 ± 0.9     | 1.9 ± 0.6 | 1.9 ± 0.6        |     |
|                    |        | All-tos           | 1.7 ± 0.6 | 1.6 ± 0.6         | 2.8 ± 0.9 | 2.8 ± 0.9     | 1.9 ± 0.7 | 1.9 ± 0.7        |     |
|                    | All    | TILA              | 1.9 ± 0.6 | 1.8 ± 0.6         | 2.9 ± 1.0 | 2.9 ± 1.0     | 2.1 ± 1.3 | 2.1 ± 1.3        |     |
|                    |        | TILA-tos          | 1.9 ± 0.6 | 1.9 ± 0.5         | 2.7 ± 0.7 | 2.7 ± 0.7     | 1.9 ± 0.7 | 1.9 ± 0.7        |     |
|                    |        | Hal               | 2.1 ± 1.6 | 1.9 ± 1.8         | 3.9 ± 2.7 | 3.9 ± 2.7     | 2.0 ± 1.5 | 2.0 ± 1.5        |     |
|                    |        | All               | 2.0 ± 1.0 | 1.8 ± 1.1         | 3.2 ± 1.7 | 3.2 ± 1.7     | 2.1 ± 1.3 | 2.1 ± 1.3        |     |
|                    |        | All-tos           | 1.9 ± 1.0 | 1.9 ± 1.1         | 3.0 ± 1.7 | 3.0 ± 1.7     | 1.9 ± 1.0 | 1.9 ± 1.0        |     |

<sup>a</sup>SAPT2+3, EFP/ACCD and EFP/ACCT data taken from reference 24.

S4. Mean absolute differences and standard deviations of EFP Dispersion energy terms relative to SAPT2+3 for >180 ion pair configurations, from reference 24, with four different basis sets for EFP terms, both with and without the valence virtual orbital approximation. Units are in kcal/mol.

|            |        | ACCD <sup>a</sup> |           | ACCT <sup>a</sup> |           | 6-311++G(d,p) |           | 6-311++G(3df,2p) |     |
|------------|--------|-------------------|-----------|-------------------|-----------|---------------|-----------|------------------|-----|
| Cations    | Anions | CMO               | VVO       | CMO               | VVO       | CMO           | VVO       | CMO              | VVO |
| Dispersion | CnMIM  | TILA              | 4.0 ± 1.5 | 4.1 ± 1.4         | 3.8 ± 1.4 | 3.8 ± 1.4     | 1.9 ± 1.9 | 1.9 ± 1.9        |     |
|            |        | TILA-tos          | 4.0 ± 1.6 | 4.0 ± 1.5         | 3.6 ± 1.4 | 3.6 ± 1.4     | 1.5 ± 1.2 | 1.5 ± 1.2        |     |
|            |        | Hal               | 2.1 ± 0.4 | 1.3 ± 1.1         | 5.4 ± 2.7 | 5.4 ± 2.7     | 2.9 ± 0.8 | 2.9 ± 0.8        |     |
|            |        | All               | 3.3 ± 1.5 | 3.2 ± 1.9         | 4.3 ± 2.1 | 4.3 ± 2.1     | 2.2 ± 1.7 | 2.2 ± 1.7        |     |
|            |        | All-tos           | 3.3 ± 1.6 | 3.0 ± 1.9         | 4.2 ± 2.1 | 4.2 ± 2.1     | 2.0 ± 1.3 | 2.0 ± 1.3        |     |
|            | CnMPyr | TILA              | 1.5 ± 0.6 | 1.6 ± 0.6         | 3.9 ± 1.3 | 3.9 ± 1.3     | 2.6 ± 1.2 | 2.6 ± 1.2        |     |
|            |        | TILA-tos          | 1.5 ± 0.7 | 1.6 ± 0.6         | 3.7 ± 1.1 | 3.7 ± 1.1     | 2.4 ± 1.0 | 2.4 ± 1.0        |     |
|            |        | Hal               | 2.3 ± 0.3 | 1.4 ± 0.2         | 5.2 ± 1.9 | 5.2 ± 1.9     | 3.3 ± 0.6 | 3.3 ± 0.6        |     |
|            |        | All               | 1.7 ± 0.7 | 1.6 ± 0.5         | 4.2 ± 1.5 | 4.2 ± 1.5     | 2.8 ± 1.1 | 2.8 ± 1.1        |     |
|            |        | All-tos           | 1.7 ± 0.7 | 1.5 ± 0.5         | 4.1 ± 1.5 | 4.1 ± 1.5     | 2.6 ± 1.0 | 2.6 ± 1.0        |     |
|            | All    | TILA              | 2.5 ± 1.6 | 2.7 ± 1.6         | 3.9 ± 1.3 | 3.9 ± 1.3     | 2.3 ± 1.6 | 2.3 ± 1.6        |     |
|            |        | TILA-tos          | 2.6 ± 1.7 | 2.6 ± 1.6         | 3.7 ± 1.2 | 3.7 ± 1.2     | 2.0 ± 1.2 | 2.0 ± 1.2        |     |
|            |        | Hal               | 2.2 ± 0.4 | 1.3 ± 0.9         | 5.3 ± 2.3 | 5.3 ± 2.3     | 3.0 ± 0.7 | 3.0 ± 0.7        |     |
|            |        | All               | 2.5 ± 1.4 | 2.3 ± 1.6         | 4.3 ± 1.8 | 4.3 ± 1.8     | 2.5 ± 1.4 | 2.5 ± 1.4        |     |
|            |        | All-tos           | 2.5 ± 1.4 | 2.2 ± 1.5         | 4.2 ± 1.8 | 4.2 ± 1.8     | 2.3 ± 1.2 | 2.3 ± 1.2        |     |

<sup>a</sup>SAPT2+3, EFP/ACCD and EFP/ACCT data taken from reference 24.

*S5. EFP Interaction Energies of 1-alkyl-3-methylimidazolium (CnMIM) cation and Typical ionic liquid anions (TILA) anion using canonical molecular orbitals with 6-311++G(3df2p) basis set. Units are in Hartree.*

| Chain | Anion | Conf | Electrostatic | Exchange Repulsion | Polarization | Dispersion(6,7,8) | Charge Transfer | Total Energy |
|-------|-------|------|---------------|--------------------|--------------|-------------------|-----------------|--------------|
| 1     | bf4   | p1   | -0.1442       | 0.0238             | -0.0140      | -0.0154           | -0.0029         | -0.1528      |
| 1     | dca   | p1   | -0.1477       | 0.0401             | -0.0110      | -0.0235           | -0.0057         | -0.1477      |
| 1     | dca   | p2   | -0.1383       | 0.0376             | -0.0156      | -0.0146           | -0.0052         | -0.1361      |
| 1     | mes   | p1   | -0.1633       | 0.0363             | -0.0187      | -0.0200           | -0.0082         | -0.1739      |
| 1     | ntf2  | p1   | -0.1371       | 0.0375             | -0.0126      | -0.0256           | -0.0065         | -0.1426      |
| 1     | ntf2  | p2   | -0.1341       | 0.0393             | -0.0168      | -0.0139           | -0.0040         | -0.1294      |
| 1     | ntf2  | p3   | -0.1332       | 0.0307             | -0.0152      | -0.0169           | -0.0029         | -0.1372      |
| 1     | pf6   | p1   | -0.1376       | 0.0227             | -0.0120      | -0.0154           | -0.0038         | -0.1461      |
| 1     | tos   | p1   | -0.2063       | 0.0362             | -0.0181      | -0.0190           | -0.0092         | -0.2163      |
| 2     | bf4   | p1   | -0.1431       | 0.0250             | -0.0153      | -0.0163           | -0.0029         | -0.1526      |
| 2     | bf4   | p2   | -0.1428       | 0.0238             | -0.0148      | -0.0148           | -0.0025         | -0.1511      |
| 2     | dca   | p1   | -0.1429       | 0.0390             | -0.0130      | -0.0234           | -0.0084         | -0.1486      |
| 2     | dca   | p2   | -0.1413       | 0.0377             | -0.0133      | -0.0229           | -0.0064         | -0.1462      |
| 2     | dca   | p3   | -0.1469       | 0.0428             | -0.0132      | -0.0236           | -0.0069         | -0.1478      |
| 2     | dca   | p4   | -0.1446       | 0.0396             | -0.0128      | -0.0223           | -0.0064         | -0.1465      |
| 2     | dca   | p5   | -0.1461       | 0.0408             | -0.0115      | -0.0233           | -0.0057         | -0.1458      |
| 2     | dca   | p6   | -0.1444       | 0.0391             | -0.0110      | -0.0235           | -0.0055         | -0.1453      |
| 2     | mes   | p1   | -0.1617       | 0.0379             | -0.0212      | -0.0213           | -0.0077         | -0.1740      |
| 2     | mes   | p2   | -0.1610       | 0.0363             | -0.0196      | -0.0199           | -0.0077         | -0.1718      |
| 2     | ntf2  | p1   | -0.1337       | 0.0392             | -0.0135      | -0.0293           | -0.0072         | -0.1445      |
| 2     | ntf2  | p2   | -0.1314       | 0.0376             | -0.0175      | -0.0168           | -0.0041         | -0.1321      |
| 2     | ntf2  | p3   | -0.1324       | 0.0325             | -0.0162      | -0.0178           | -0.0031         | -0.1371      |
| 2     | ntf2  | p4   | -0.1333       | 0.0347             | -0.0129      | -0.0251           | -0.0043         | -0.1409      |
| 2     | pf6   | p1   | -0.1370       | 0.0246             | -0.0130      | -0.0171           | -0.0045         | -0.1470      |
| 2     | pf6   | p2   | -0.1361       | 0.0225             | -0.0122      | -0.0153           | -0.0035         | -0.1447      |
| 2     | tos   | p1   | -0.0508       | 0.0313             | -0.0064      | -0.0119           | -0.0072         | -0.0449      |
| 2     | tos   | p2   | -0.0165       | 0.0300             | -0.0060      | -0.0099           | -0.0062         | -0.0085      |
| 3     | bf4   | p1   | -0.1429       | 0.0241             | -0.0160      | -0.0168           | -0.0001         | -0.1517      |
| 3     | bf4   | p2   | -0.1451       | 0.0233             | -0.0152      | -0.0162           | -0.0001         | -0.1533      |
| 3     | dca   | p1   | -0.1409       | 0.0384             | -0.0136      | -0.0237           | -0.0016         | -0.1413      |
| 3     | dca   | p2   | -0.1412       | 0.0384             | -0.0126      | -0.0247           | -0.0011         | -0.1412      |
| 3     | dca   | p3   | -0.1382       | 0.0375             | -0.0149      | -0.0187           | -0.0019         | -0.1363      |
| 3     | dca   | p4   | -0.1467       | 0.0418             | -0.0135      | -0.0255           | -0.0015         | -0.1454      |
| 3     | dca   | p5   | -0.1420       | 0.0381             | -0.0112      | -0.0238           | -0.0011         | -0.1400      |
| 3     | dca   | p6   | -0.1420       | 0.0379             | -0.0111      | -0.0236           | -0.0011         | -0.1398      |
| 3     | mes   | p1   | -0.1619       | 0.0384             | -0.0230      | -0.0224           | -0.0012         | -0.1700      |
| 3     | mes   | p2   | -0.1589       | 0.0349             | -0.0201      | -0.0201           | -0.0012         | -0.1654      |
| 3     | ntf2  | p1   | -0.1335       | 0.0407             | -0.0139      | -0.0307           | -0.0073         | -0.1448      |
| 3     | ntf2  | p2   | -0.1311       | 0.0385             | -0.0178      | -0.0183           | -0.0041         | -0.1328      |
| 3     | ntf2  | p3   | -0.1322       | 0.0334             | -0.0167      | -0.0186           | -0.0032         | -0.1374      |
| 3     | ntf2  | p4   | -0.1296       | 0.0331             | -0.0124      | -0.0253           | -0.0041         | -0.1383      |
| 3     | pf6   | p1   | -0.1320       | 0.0226             | -0.0127      | -0.0166           | 0.0000          | -0.1388      |
| 3     | pf6   | p2   | -0.1349       | 0.0218             | -0.0122      | -0.0153           | 0.0000          | -0.1406      |
| 3     | tos   | p1   | -0.2033       | 0.0373             | -0.0193      | -0.0308           | -0.0011         | -0.2173      |
| 3     | tos   | p2   | -0.2091       | 0.0364             | -0.0185      | -0.0297           | -0.0011         | -0.2222      |
| 4     | bf4   | p1   | -0.1432       | 0.0256             | -0.0165      | -0.0172           | -0.0032         | -0.1545      |
| 4     | bf4   | p2   | -0.1423       | 0.0247             | -0.0157      | -0.0163           | -0.0033         | -0.1529      |
| 4     | dca   | p1   | -0.1395       | 0.0396             | -0.0136      | -0.0242           | -0.0091         | -0.1467      |
| 4     | dca   | p2   | -0.1474       | 0.0433             | -0.0140      | -0.0262           | -0.0093         | -0.1535      |
| 4     | dca   | p3   | -0.1417       | 0.0387             | -0.0113      | -0.0239           | -0.0058         | -0.1440      |
| 4     | mes   | p1   | -0.1623       | 0.0403             | -0.0236      | -0.0230           | -0.0090         | -0.1776      |
| 4     | mes   | p2   | -0.1589       | 0.0364             | -0.0204      | -0.0201           | -0.0079         | -0.1709      |
| 4     | pf6   | p1   | -0.1368       | 0.0257             | -0.0142      | -0.0184           | -0.0050         | -0.1486      |
| 4     | pf6   | p2   | -0.1340       | 0.0224             | -0.0126      | -0.0153           | -0.0036         | -0.1431      |
| 4     | tos   | p1   | -0.2135       | 0.0394             | -0.0206      | -0.0239           | -0.0105         | -0.2291      |
| 4     | tos   | p2   | -0.2069       | 0.0376             | -0.0205      | -0.0205           | -0.0110         | -0.2212      |

*S6. EFP Interaction Energies of CnMIM cation and TILA anion using Valance Virtual Orbital (VVO) Approximation with 6-311++G(3df2p) basis set. Units are in Hartree.*

| Chain | Anion | Conf | Electrostatic | Exchange Repulsion | Polarization | Dispersion(6,7,8) | Charge Transfer | Total Energy |
|-------|-------|------|---------------|--------------------|--------------|-------------------|-----------------|--------------|
| 1     | bf4   | p1   | -0.1442       | 0.0238             | -0.0140      | -0.0154           | 0.0000          | -0.1499      |
| 1     | dca   | p1   | -0.1477       | 0.0401             | -0.0110      | -0.0235           | -0.0018         | -0.1438      |
| 1     | dca   | p2   | -0.1383       | 0.0376             | -0.0156      | -0.0146           | -0.0030         | -0.1339      |
| 1     | mes   | p1   | -0.1633       | 0.0363             | -0.0187      | -0.0200           | -0.0015         | -0.1672      |
| 1     | ntf2  | p1   | -0.1371       | 0.0375             | -0.0126      | -0.0256           | -0.0008         | -0.1385      |
| 1     | ntf2  | p2   | -0.1341       | 0.0393             | -0.0168      | -0.0139           | -0.0026         | -0.1281      |
| 1     | ntf2  | p3   | -0.1332       | 0.0307             | -0.0152      | -0.0169           | -0.0009         | -0.1356      |
| 1     | pf6   | p1   | -0.1376       | 0.0227             | -0.0120      | -0.0154           | -0.0007         | -0.1430      |
| 1     | tos   | p1   | -0.2063       | 0.0362             | -0.0181      | -0.0190           | -0.0016         | -0.2088      |
| 2     | bf4   | p1   | -0.1431       | 0.0250             | -0.0153      | -0.0163           | 0.0000          | -0.1497      |
| 2     | bf4   | p2   | -0.1428       | 0.0238             | -0.0148      | -0.0148           | 0.0000          | -0.1486      |
| 2     | dca   | p1   | -0.1429       | 0.0390             | -0.0130      | -0.0234           | -0.0023         | -0.1426      |
| 2     | dca   | p2   | -0.1413       | 0.0377             | -0.0133      | -0.0229           | -0.0021         | -0.1418      |
| 2     | dca   | p3   | -0.1469       | 0.0428             | -0.0132      | -0.0236           | -0.0020         | -0.1429      |
| 2     | dca   | p4   | -0.1446       | 0.0396             | -0.0128      | -0.0223           | -0.0020         | -0.1421      |
| 2     | dca   | p5   | -0.1461       | 0.0408             | -0.0115      | -0.0233           | -0.0018         | -0.1419      |
| 2     | dca   | p6   | -0.1444       | 0.0391             | -0.0110      | -0.0235           | -0.0017         | -0.1415      |
| 2     | mes   | p1   | -0.1617       | 0.0379             | -0.0212      | -0.0213           | -0.0015         | -0.1679      |
| 2     | mes   | p2   | -0.1610       | 0.0363             | -0.0196      | -0.0199           | -0.0014         | -0.1656      |
| 2     | ntf2  | p1   | -0.1337       | 0.0392             | -0.0135      | -0.0293           | -0.0014         | -0.1387      |
| 2     | ntf2  | p2   | -0.1314       | 0.0376             | -0.0175      | -0.0168           | -0.0024         | -0.1305      |
| 2     | ntf2  | p3   | -0.1324       | 0.0325             | -0.0162      | -0.0178           | -0.0011         | -0.1350      |
| 2     | ntf2  | p4   | -0.1333       | 0.0347             | -0.0129      | -0.0251           | -0.0010         | -0.1376      |
| 2     | pf6   | p1   | -0.1370       | 0.0246             | -0.0130      | -0.0171           | 0.0000          | -0.1425      |
| 2     | pf6   | p2   | -0.1361       | 0.0225             | -0.0122      | -0.0153           | 0.0000          | -0.1411      |
| 2     | tos   | p1   | -0.0508       | 0.0313             | -0.0064      | -0.0119           | -0.0014         | -0.0391      |
| 2     | tos   | p2   | -0.0165       | 0.0300             | -0.0060      | -0.0099           | -0.0012         | -0.0036      |
| 3     | bf4   | p1   | -0.1429       | 0.0241             | -0.0160      | -0.0168           | -0.0001         | -0.1517      |
| 3     | bf4   | p2   | -0.1451       | 0.0233             | -0.0152      | -0.0162           | -0.0001         | -0.1533      |
| 3     | dca   | p1   | -0.1409       | 0.0384             | -0.0136      | -0.0237           | -0.0016         | -0.1413      |
| 3     | dca   | p2   | -0.1412       | 0.0384             | -0.0126      | -0.0247           | -0.0011         | -0.1412      |
| 3     | dca   | p3   | -0.1382       | 0.0375             | -0.0149      | -0.0187           | -0.0019         | -0.1363      |
| 3     | dca   | p4   | -0.1467       | 0.0418             | -0.0135      | -0.0255           | -0.0015         | -0.1454      |
| 3     | dca   | p5   | -0.1420       | 0.0381             | -0.0112      | -0.0238           | -0.0011         | -0.1400      |
| 3     | dca   | p6   | -0.1420       | 0.0379             | -0.0111      | -0.0236           | -0.0011         | -0.1398      |
| 3     | mes   | p1   | -0.1619       | 0.0384             | -0.0230      | -0.0224           | -0.0012         | -0.1700      |
| 3     | mes   | p2   | -0.1589       | 0.0349             | -0.0201      | -0.0201           | -0.0012         | -0.1654      |
| 3     | ntf2  | p1   | -0.1335       | 0.0407             | -0.0139      | -0.0307           | -0.0009         | -0.1384      |
| 3     | ntf2  | p2   | -0.1311       | 0.0385             | -0.0178      | -0.0183           | -0.0022         | -0.1309      |
| 3     | ntf2  | p3   | -0.1322       | 0.0334             | -0.0167      | -0.0186           | -0.0010         | -0.1352      |
| 3     | ntf2  | p4   | -0.1296       | 0.0331             | -0.0124      | -0.0253           | -0.0008         | -0.1351      |
| 3     | pf6   | p1   | -0.1320       | 0.0226             | -0.0127      | -0.0166           | 0.0000          | -0.1388      |
| 3     | pf6   | p2   | -0.1349       | 0.0218             | -0.0122      | -0.0153           | 0.0000          | -0.1406      |
| 3     | tos   | p1   | -0.2033       | 0.0373             | -0.0193      | -0.0308           | -0.0011         | -0.2173      |
| 3     | tos   | p2   | -0.2091       | 0.0364             | -0.0185      | -0.0297           | -0.0011         | -0.2222      |
| 4     | bf4   | p1   | -0.1432       | 0.0256             | -0.0165      | -0.0172           | 0.0000          | -0.1512      |
| 4     | bf4   | p2   | -0.1423       | 0.0247             | -0.0157      | -0.0163           | 0.0000          | -0.1497      |
| 4     | dca   | p1   | -0.1395       | 0.0396             | -0.0136      | -0.0242           | -0.0024         | -0.1400      |
| 4     | dca   | p2   | -0.1474       | 0.0433             | -0.0140      | -0.0262           | -0.0023         | -0.1465      |
| 4     | dca   | p3   | -0.1417       | 0.0387             | -0.0113      | -0.0239           | -0.0017         | -0.1399      |
| 4     | mes   | p1   | -0.1623       | 0.0403             | -0.0236      | -0.0230           | -0.0016         | -0.1702      |
| 4     | mes   | p2   | -0.1589       | 0.0364             | -0.0204      | -0.0201           | -0.0014         | -0.1644      |
| 4     | pf6   | p1   | -0.1368       | 0.0257             | -0.0142      | -0.0184           | 0.0000          | -0.1436      |
| 4     | pf6   | p2   | -0.1340       | 0.0224             | -0.0126      | -0.0153           | 0.0000          | -0.1395      |
| 4     | tos   | p1   | -0.2135       | 0.0394             | -0.0206      | -0.0239           | -0.0019         | -0.2205      |
| 4     | tos   | p2   | -0.2069       | 0.0376             | -0.0205      | -0.0205           | -0.0017         | -0.2119      |



S7. EFP Interaction Energies of CnMIM cation and halide anion using canonical molecular orbitals with 6-311++G(3df2p) basis set. Units are in Hartree.

| Chain | Anion | Conf | Electrostatic | Exchange Repulsion | Polarization | Dispersion(6,7,8) | Charge Transfer | Total Energy |
|-------|-------|------|---------------|--------------------|--------------|-------------------|-----------------|--------------|
| 1     | br    | p1   | -0.1699       | 0.0807             | -0.0286      | -0.0195           | -0.0286         | -0.1658      |
| 1     | br    | p2   | -0.1581       | 0.0604             | -0.0311      | -0.0111           | -0.0063         | -0.1463      |
| 1     | cl    | p1   | -0.1773       | 0.0763             | -0.0257      | -0.0169           | -0.0258         | -0.1694      |
| 1     | cl    | p2   | -0.1671       | 0.0654             | -0.0321      | -0.0097           | -0.0083         | -0.1517      |
| 2     | br    | p1   | -0.1638       | 0.0798             | -0.0267      | -0.0199           | -0.0231         | -0.1537      |
| 2     | br    | p2   | -0.1580       | 0.0613             | -0.0332      | -0.0114           | -0.0045         | -0.1458      |
| 2     | br    | p3   | -0.1569       | 0.0611             | -0.0329      | -0.0123           | -0.0073         | -0.1483      |
| 2     | br    | p4   | -0.1672       | 0.0787             | -0.0283      | -0.0201           | -0.0300         | -0.1669      |
| 2     | cl    | p1   | -0.1710       | 0.0756             | -0.0258      | -0.0170           | -0.0217         | -0.1599      |
| 2     | cl    | p2   | -0.1663       | 0.0640             | -0.0326      | -0.0100           | -0.0078         | -0.1526      |
| 2     | cl    | p3   | -0.1655       | 0.0642             | -0.0303      | -0.0117           | -0.0084         | -0.1516      |
| 2     | cl    | p4   | -0.1739       | 0.0739             | -0.0279      | -0.0165           | -0.0268         | -0.1712      |
| 3     | br    | p1   | -0.1630       | 0.0806             | -0.0292      | -0.0204           | -0.0247         | -0.1567      |
| 3     | br    | p2   | -0.1568       | 0.0582             | -0.0419      | -0.0096           | -0.0018         | -0.1519      |
| 3     | br    | p3   | -0.1570       | 0.0659             | -0.0291      | -0.0143           | -0.0078         | -0.1422      |
| 3     | br    | p4   | -0.1683       | 0.0792             | -0.0348      | -0.0198           | -0.0403         | -0.1840      |
| 3     | cl    | p1   | -0.1687       | 0.0757             | -0.0269      | -0.0173           | -0.0215         | -0.1587      |
| 3     | cl    | p2   | -0.1648       | 0.0673             | -0.0316      | -0.0101           | -0.0074         | -0.1467      |
| 3     | cl    | p3   | -0.1649       | 0.0638             | -0.0327      | -0.0125           | -0.0091         | -0.1553      |
| 3     | cl    | p4   | -0.1725       | 0.0767             | -0.0285      | -0.0178           | -0.0356         | -0.1776      |
| 4     | br    | p1   | -0.1631       | 0.0780             | -0.0331      | -0.0199           | -0.0272         | -0.1654      |
| 4     | br    | p2   | -0.1557       | 0.0664             | -0.0301      | -0.0119           | -0.0057         | -0.1370      |
| 4     | br    | p3   | -0.1559       | 0.0644             | -0.0335      | -0.0152           | -0.0135         | -0.1537      |
| 4     | br    | p4   | -0.1652       | 0.0810             | -0.0294      | -0.0212           | -0.0509         | -0.1858      |
| 4     | cl    | p1   | -0.1682       | 0.0724             | -0.0296      | -0.0171           | -0.0224         | -0.1649      |
| 4     | cl    | p2   | -0.1639       | 0.0623             | -0.0385      | -0.0084           | -0.0072         | -0.1558      |
| 4     | cl    | p3   | -0.1637       | 0.0650             | -0.0326      | -0.0130           | -0.0121         | -0.1564      |
| 4     | cl    | p4   | -0.1709       | 0.0796             | -0.0269      | -0.0179           | -0.0437         | -0.1797      |

S8. EFP Interaction Energies of CnMIM cation and halide anion using VVO Approximation with 6-311++G(3df2p) basis set. Units are in Hartree.

| Chain | Anion | Conf | Electrostatic | Exchange Repulsion | Polarization | Dispersion(6,7,8) | Charge Transfer | Total Energy |
|-------|-------|------|---------------|--------------------|--------------|-------------------|-----------------|--------------|
| 1     | br    | p1   | -0.1699       | 0.0807             | -0.0286      | -0.0195           | -0.0040         | -0.1412      |
| 1     | br    | p2   | -0.1580       | 0.0604             | -0.0311      | -0.0111           | -0.0035         | -0.1434      |
| 1     | cl    | p1   | -0.1773       | 0.0763             | -0.0257      | -0.0169           | -0.0037         | -0.1473      |
| 1     | cl    | p2   | -0.1671       | 0.0654             | -0.0321      | -0.0097           | -0.0039         | -0.1472      |
| 2     | br    | p1   | -0.1638       | 0.0798             | -0.0267      | -0.0199           | -0.0034         | -0.1341      |
| 2     | br    | p2   | -0.1580       | 0.0613             | -0.0332      | -0.0114           | -0.0036         | -0.1449      |
| 2     | br    | p3   | -0.1569       | 0.0611             | -0.0329      | -0.0123           | -0.0031         | -0.1441      |
| 2     | br    | p4   | -0.1672       | 0.0787             | -0.0283      | -0.0201           | -0.0041         | -0.1410      |
| 2     | cl    | p1   | -0.1710       | 0.0756             | -0.0258      | -0.0170           | -0.0032         | -0.1414      |
| 2     | cl    | p2   | -0.1663       | 0.0640             | -0.0326      | -0.0100           | -0.0039         | -0.1488      |
| 2     | cl    | p3   | -0.1655       | 0.0642             | -0.0303      | -0.0117           | -0.0034         | -0.1466      |
| 2     | cl    | p4   | -0.1739       | 0.0739             | -0.0279      | -0.0165           | -0.0038         | -0.1482      |
| 3     | br    | p1   | -0.1630       | 0.0806             | -0.0292      | -0.0204           | -0.0030         | -0.1351      |
| 3     | br    | p2   | -0.1568       | 0.0582             | -0.0419      | -0.0096           | -0.0035         | -0.1537      |
| 3     | br    | p3   | -0.1570       | 0.0659             | -0.0291      | -0.0143           | -0.0027         | -0.1371      |
| 3     | br    | p4   | -0.1683       | 0.0792             | -0.0348      | -0.0198           | -0.0040         | -0.1477      |
| 3     | cl    | p1   | -0.1687       | 0.0757             | -0.0269      | -0.0173           | -0.0028         | -0.1400      |
| 3     | cl    | p2   | -0.1648       | 0.0673             | -0.0316      | -0.0101           | -0.0039         | -0.1432      |
| 3     | cl    | p3   | -0.1649       | 0.0638             | -0.0327      | -0.0125           | -0.0030         | -0.1492      |
| 3     | cl    | p4   | -0.1725       | 0.0767             | -0.0285      | -0.0178           | -0.0037         | -0.1457      |
| 4     | br    | p1   | -0.1631       | 0.0780             | -0.0331      | -0.0199           | -0.0029         | -0.1411      |
| 4     | br    | p2   | -0.1557       | 0.0664             | -0.0301      | -0.0119           | -0.0032         | -0.1345      |
| 4     | br    | p3   | -0.1559       | 0.0644             | -0.0335      | -0.0152           | -0.0026         | -0.1428      |
| 4     | br    | p4   | -0.1652       | 0.0810             | -0.0294      | -0.0212           | -0.0045         | -0.1393      |
| 4     | cl    | p1   | -0.1682       | 0.0724             | -0.0296      | -0.0171           | -0.0027         | -0.1452      |
| 4     | cl    | p2   | -0.1639       | 0.0623             | -0.0385      | -0.0084           | -0.0035         | -0.1520      |
| 4     | cl    | p3   | -0.1637       | 0.0650             | -0.0326      | -0.0130           | -0.0029         | -0.1472      |
| 4     | cl    | p4   | -0.1709       | 0.0796             | -0.0269      | -0.0179           | -0.0041         | -0.1402      |

*S9. EFP Interaction Energies of CnMIM cation and TILA anion using canonical molecular orbitals with 6-311++G(d,p) basis set. Units are in Hartree.*

| Chain | Anion | Conf | Electrostatic | Exchange Repulsion | Polarization | Dispersion(6,7,8) | Charge Transfer | Total Energy |
|-------|-------|------|---------------|--------------------|--------------|-------------------|-----------------|--------------|
| 1     | bf4   | p1   | -0.1474       | 0.0214             | -0.0118      | -0.0119           | -0.0042         | -0.1539      |
| 1     | dca   | p1   | -0.1463       | 0.0381             | -0.0097      | -0.0204           | -0.0031         | -0.1413      |
| 1     | dca   | p2   | -0.1384       | 0.0341             | -0.0135      | -0.0127           | -0.0032         | -0.1336      |
| 1     | mes   | p1   | -0.1642       | 0.0323             | -0.0173      | -0.0164           | -0.0057         | -0.1713      |
| 1     | ntf2  | p1   | -0.1405       | 0.0299             | -0.0116      | -0.0232           | -0.0038         | -0.1492      |
| 1     | ntf2  | p2   | -0.1425       | 0.0371             | -0.0150      | -0.0121           | -0.0033         | -0.1359      |
| 1     | ntf2  | p3   | -0.1347       | 0.0251             | -0.0149      | -0.0136           | -0.0019         | -0.1401      |
| 1     | pf6   | p1   | -0.1389       | 0.0204             | -0.0105      | -0.0113           | -0.0027         | -0.1429      |
| 1     | tos   | p1   | -0.2668       | 0.0321             | -0.0142      | -0.0160           | -0.0078         | -0.2728      |
| 2     | bf4   | p1   | -0.1443       | 0.0224             | -0.0132      | -0.0128           | -0.0050         | -0.1527      |
| 2     | bf4   | p2   | -0.1449       | 0.0208             | -0.0124      | -0.0115           | -0.0044         | -0.1523      |
| 2     | dca   | p1   | -0.1427       | 0.0365             | -0.0114      | -0.0204           | -0.0043         | -0.1423      |
| 2     | dca   | p2   | -0.1397       | 0.0352             | -0.0116      | -0.0199           | -0.0040         | -0.1401      |
| 2     | dca   | p3   | -0.1443       | 0.0394             | -0.0114      | -0.0204           | -0.0034         | -0.1400      |
| 2     | dca   | p4   | -0.1448       | 0.0364             | -0.0108      | -0.0193           | -0.0035         | -0.1420      |
| 2     | dca   | p5   | -0.1453       | 0.0385             | -0.0100      | -0.0203           | -0.0030         | -0.1401      |
| 2     | dca   | p6   | -0.1425       | 0.0370             | -0.0098      | -0.0204           | -0.0040         | -0.1396      |
| 2     | mes   | p1   | -0.1616       | 0.0343             | -0.0199      | -0.0175           | -0.0063         | -0.1711      |
| 2     | mes   | p2   | -0.1629       | 0.0322             | -0.0179      | -0.0164           | -0.0057         | -0.1707      |
| 2     | ntf2  | p1   | -0.1387       | 0.0321             | -0.0124      | -0.0256           | 0.0000          | -0.1448      |
| 2     | ntf2  | p2   | -0.1298       | 0.0331             | -0.0167      | -0.0144           | -0.0030         | -0.1309      |
| 2     | ntf2  | p3   | -0.1369       | 0.0264             | -0.0161      | -0.0143           | 0.0003          | -0.1405      |
| 2     | ntf2  | p4   | -0.1319       | 0.0267             | -0.0118      | -0.0217           | 0.0007          | -0.1381      |
| 2     | pf6   | p1   | -0.1361       | 0.0222             | -0.0116      | -0.0125           | -0.0035         | -0.1414      |
| 2     | pf6   | p2   | -0.1341       | 0.0199             | -0.0108      | -0.0111           | -0.0028         | -0.1390      |
| 2     | tos   | p1   | -0.2527       | 0.0336             | -0.0147      | -0.0178           | -0.0119         | -0.2635      |
| 2     | tos   | p2   | -0.2585       | 0.0313             | -0.0135      | -0.0157           | -0.0092         | -0.2655      |
| 3     | bf4   | p1   | -0.1439       | 0.0229             | -0.0140      | -0.0132           | -0.0051         | -0.1533      |
| 3     | bf4   | p2   | -0.1434       | 0.0218             | -0.0134      | -0.0126           | -0.0046         | -0.1522      |
| 3     | dca   | p1   | -0.1415       | 0.0369             | -0.0119      | -0.0207           | -0.0044         | -0.1416      |
| 3     | dca   | p2   | -0.1421       | 0.0364             | -0.0110      | -0.0216           | -0.0031         | -0.1413      |
| 3     | dca   | p3   | -0.1374       | 0.0352             | -0.0135      | -0.0163           | -0.0035         | -0.1355      |
| 3     | dca   | p4   | -0.1469       | 0.0388             | -0.0125      | -0.0219           | -0.0048         | -0.1473      |
| 3     | dca   | p5   | -0.1430       | 0.0366             | -0.0095      | -0.0208           | -0.0040         | -0.1408      |
| 3     | dca   | p6   | -0.1433       | 0.0368             | -0.0099      | -0.0205           | -0.0047         | -0.1417      |
| 3     | mes   | p1   | -0.1621       | 0.0361             | -0.0216      | -0.0184           | -0.0065         | -0.1726      |
| 3     | mes   | p2   | -0.1607       | 0.0323             | -0.0184      | -0.0165           | -0.0071         | -0.1704      |
| 3     | ntf2  | p1   | -0.1406       | 0.0333             | -0.0130      | -0.0269           | -0.0051         | -0.1522      |
| 3     | ntf2  | p2   | -0.1306       | 0.0333             | -0.0172      | -0.0157           | -0.0047         | -0.1349      |
| 3     | ntf2  | p3   | -0.1327       | 0.0273             | -0.0166      | -0.0151           | -0.0022         | -0.1393      |
| 3     | ntf2  | p4   | -0.1324       | 0.0250             | -0.0115      | -0.0219           | -0.0040         | -0.1448      |
| 3     | pf6   | p1   | -0.1315       | 0.0200             | -0.0112      | -0.0120           | -0.0024         | -0.1372      |
| 3     | pf6   | p2   | -0.1331       | 0.0198             | -0.0110      | -0.0112           | -0.0031         | -0.1385      |
| 3     | tos   | p1   | -0.2434       | 0.0349             | -0.0160      | -0.0193           | -0.0121         | -0.2559      |
| 3     | tos   | p2   | -0.2341       | 0.0327             | -0.0140      | -0.0178           | -0.0135         | -0.2467      |
| 4     | bf4   | p1   | -0.1436       | 0.0229             | -0.0146      | -0.0134           | -0.0053         | -0.1540      |
| 4     | bf4   | p2   | -0.1416       | 0.0217             | -0.0137      | -0.0127           | -0.0047         | -0.1510      |
| 4     | dca   | p1   | -0.1409       | 0.0369             | -0.0123      | -0.0211           | -0.0044         | -0.1417      |
| 4     | dca   | p2   | -0.1478       | 0.0394             | -0.0124      | -0.0228           | -0.0046         | -0.1481      |
| 4     | dca   | p3   | -0.1431       | 0.0364             | -0.0096      | -0.0209           | -0.0043         | -0.1415      |
| 4     | mes   | p1   | -0.1684       | 0.0363             | -0.0224      | -0.0190           | -0.0070         | -0.1805      |
| 4     | mes   | p2   | -0.1605       | 0.0323             | -0.0186      | -0.0165           | -0.0070         | -0.1704      |
| 4     | pf6   | p1   | -0.1366       | 0.0232             | -0.0129      | -0.0135           | -0.0038         | -0.1434      |
| 4     | pf6   | p2   | -0.1316       | 0.0197             | -0.0112      | -0.0112           | -0.0031         | -0.1375      |
| 4     | tos   | p1   | -0.2389       | 0.0356             | -0.0163      | -0.0202           | -0.0153         | -0.2552      |
| 4     | tos   | p2   | -0.2038       | 0.0337             | -0.0165      | -0.0171           | -0.0106         | -0.2142      |

*S10. EFP Interaction Energies of CnMIM cation and TILA anion using Valance Virtual Orbital (VVO) Approximation with 6-311++G(d,p) basis set. Units are in Hartree.*

| Chain | Anion | Conf | Electrostatic | Exchange Repulsion | Polarization | Dispersion(6,7,8) | Charge Transfer | Total Energy |
|-------|-------|------|---------------|--------------------|--------------|-------------------|-----------------|--------------|
| 1     | bf4   | p1   | -0.1474       | 0.0214             | -0.0118      | -0.0119           | -0.0003         | -0.1500      |
| 1     | dca   | p1   | -0.1463       | 0.0381             | -0.0097      | -0.0204           | -0.0009         | -0.1391      |
| 1     | dca   | p2   | -0.1384       | 0.0341             | -0.0135      | -0.0127           | -0.0020         | -0.1324      |
| 1     | mes   | p1   | -0.1642       | 0.0323             | -0.0173      | -0.0164           | -0.0011         | -0.1667      |
| 1     | ntf2  | p1   | -0.1405       | 0.0299             | -0.0116      | -0.0232           | -0.0008         | -0.1462      |
| 1     | ntf2  | p2   | -0.1425       | 0.0371             | -0.0150      | -0.0121           | -0.0025         | -0.1351      |
| 1     | ntf2  | p3   | -0.1347       | 0.0251             | -0.0149      | -0.0136           | -0.0009         | -0.1391      |
| 1     | pf6   | p1   | -0.1389       | 0.0204             | -0.0105      | -0.0113           | 0.0000          | -0.1402      |
| 1     | tos   | p1   | -0.2668       | 0.0321             | -0.0142      | -0.0160           | -0.0012         | -0.2662      |
| 2     | bf4   | p1   | -0.1443       | 0.0224             | -0.0132      | -0.0128           | -0.0004         | -0.1481      |
| 2     | bf4   | p2   | -0.1449       | 0.0208             | -0.0124      | -0.0115           | -0.0004         | -0.1483      |
| 2     | dca   | p1   | -0.1427       | 0.0365             | -0.0114      | -0.0204           | -0.0013         | -0.1392      |
| 2     | dca   | p2   | -0.1397       | 0.0352             | -0.0116      | -0.0199           | -0.0012         | -0.1373      |
| 2     | dca   | p3   | -0.1443       | 0.0394             | -0.0114      | -0.0204           | -0.0010         | -0.1377      |
| 2     | dca   | p4   | -0.1448       | 0.0364             | -0.0108      | -0.0193           | -0.0011         | -0.1396      |
| 2     | dca   | p5   | -0.1453       | 0.0385             | -0.0100      | -0.0203           | -0.0009         | -0.1380      |
| 2     | dca   | p6   | -0.1425       | 0.0370             | -0.0098      | -0.0204           | -0.0010         | -0.1366      |
| 2     | mes   | p1   | -0.1616       | 0.0343             | -0.0199      | -0.0175           | -0.0012         | -0.1659      |
| 2     | mes   | p2   | -0.1629       | 0.0322             | -0.0179      | -0.0164           | -0.0012         | -0.1662      |
| 2     | ntf2  | p1   | -0.1387       | 0.0321             | -0.0124      | -0.0256           | -0.0008         | -0.1455      |
| 2     | ntf2  | p2   | -0.1298       | 0.0331             | -0.0167      | -0.0144           | -0.0024         | -0.1303      |
| 2     | ntf2  | p3   | -0.1369       | 0.0264             | -0.0161      | -0.0143           | -0.0010         | -0.1419      |
| 2     | ntf2  | p4   | -0.1319       | 0.0267             | -0.0118      | -0.0217           | -0.0008         | -0.1395      |
| 2     | pf6   | p1   | -0.1361       | 0.0222             | -0.0116      | -0.0125           | 0.0000          | -0.1379      |
| 2     | pf6   | p2   | -0.1341       | 0.0199             | -0.0108      | -0.0111           | 0.0000          | -0.1362      |
| 2     | tos   | p1   | -0.2527       | 0.0336             | -0.0147      | -0.0178           | -0.0017         | -0.2533      |
| 2     | tos   | p2   | -0.2585       | 0.0313             | -0.0135      | -0.0157           | -0.0017         | -0.2580      |
| 3     | bf4   | p1   | -0.1439       | 0.0229             | -0.0140      | -0.0132           | -0.0003         | -0.1485      |
| 3     | bf4   | p2   | -0.1434       | 0.0218             | -0.0134      | -0.0126           | -0.0004         | -0.1480      |
| 3     | dca   | p1   | -0.1415       | 0.0369             | -0.0119      | -0.0207           | -0.0012         | -0.1385      |
| 3     | dca   | p2   | -0.1421       | 0.0364             | -0.0110      | -0.0216           | -0.0008         | -0.1390      |
| 3     | dca   | p3   | -0.1374       | 0.0352             | -0.0135      | -0.0163           | -0.0015         | -0.1336      |
| 3     | dca   | p4   | -0.1469       | 0.0388             | -0.0125      | -0.0219           | -0.0011         | -0.1436      |
| 3     | dca   | p5   | -0.1430       | 0.0366             | -0.0095      | -0.0208           | -0.0009         | -0.1376      |
| 3     | dca   | p6   | -0.1433       | 0.0368             | -0.0099      | -0.0205           | -0.0010         | -0.1379      |
| 3     | mes   | p1   | -0.1621       | 0.0361             | -0.0216      | -0.0184           | -0.0012         | -0.1673      |
| 3     | mes   | p2   | -0.1607       | 0.0323             | -0.0184      | -0.0165           | -0.0012         | -0.1645      |
| 3     | ntf2  | p1   | -0.1406       | 0.0333             | -0.0130      | -0.0269           | -0.0008         | -0.1479      |
| 3     | ntf2  | p2   | -0.1306       | 0.0333             | -0.0172      | -0.0157           | -0.0022         | -0.1325      |
| 3     | ntf2  | p3   | -0.1327       | 0.0273             | -0.0166      | -0.0151           | -0.0010         | -0.1382      |
| 3     | ntf2  | p4   | -0.1324       | 0.0250             | -0.0115      | -0.0219           | -0.0008         | -0.1416      |
| 3     | pf6   | p1   | -0.1315       | 0.0200             | -0.0112      | -0.0120           | 0.0000          | -0.1348      |
| 3     | pf6   | p2   | -0.1331       | 0.0198             | -0.0110      | -0.0112           | 0.0000          | -0.1355      |
| 3     | tos   | p1   | -0.2434       | 0.0349             | -0.0160      | -0.0193           | -0.0016         | -0.2454      |
| 3     | tos   | p2   | -0.2341       | 0.0327             | -0.0140      | -0.0178           | -0.0015         | -0.2347      |
| 4     | bf4   | p1   | -0.1436       | 0.0229             | -0.0146      | -0.0134           | -0.0003         | -0.1490      |
| 4     | bf4   | p2   | -0.1416       | 0.0217             | -0.0137      | -0.0127           | -0.0003         | -0.1466      |
| 4     | dca   | p1   | -0.1409       | 0.0369             | -0.0123      | -0.0211           | -0.0012         | -0.1386      |
| 4     | dca   | p2   | -0.1478       | 0.0394             | -0.0124      | -0.0228           | -0.0011         | -0.1446      |
| 4     | dca   | p3   | -0.1431       | 0.0364             | -0.0096      | -0.0209           | -0.0008         | -0.1381      |
| 4     | mes   | p1   | -0.1684       | 0.0363             | -0.0224      | -0.0190           | -0.0012         | -0.1747      |
| 4     | mes   | p2   | -0.1605       | 0.0323             | -0.0186      | -0.0165           | -0.0012         | -0.1645      |
| 4     | pf6   | p1   | -0.1366       | 0.0232             | -0.0129      | -0.0135           | 0.0000          | -0.1397      |
| 4     | pf6   | p2   | -0.1316       | 0.0197             | -0.0112      | -0.0112           | 0.0000          | -0.1343      |
| 4     | tos   | p1   | -0.2389       | 0.0356             | -0.0163      | -0.0202           | -0.0019         | -0.2418      |
| 4     | tos   | p2   | -0.2038       | 0.0337             | -0.0165      | -0.0171           | -0.0015         | -0.2051      |

*S11. EFP Interaction Energies of CnMIM cation and halide anion using canonical molecular orbitals with 6-311++G(d,p) basis set. Units are in Hartree.*

| Chain | Anion | Conf | Electrostatic | Exchange Repulsion | Polarization | Dispersion(6,7,8) | Charge Transfer | Total Energy |
|-------|-------|------|---------------|--------------------|--------------|-------------------|-----------------|--------------|
| 1     | br    | p1   | -0.1702       | 0.0832             | -0.0251      | -0.0192           | -0.0093         | -0.1407      |
| 1     | br    | p2   | -0.1578       | 0.0582             | -0.0336      | -0.0099           | -0.0022         | -0.1453      |
| 1     | cl    | p1   | -0.1783       | 0.0777             | -0.0216      | -0.0079           | -0.0126         | -0.1427      |
| 1     | cl    | p2   | -0.1667       | 0.0634             | -0.0275      | -0.0033           | -0.0094         | -0.1436      |
| 2     | br    | p1   | -0.1631       | 0.0806             | -0.0260      | -0.0193           | -0.0096         | -0.1373      |
| 2     | br    | p2   | -0.1577       | 0.0611             | -0.0336      | -0.0108           | -0.0007         | -0.1418      |
| 2     | br    | p3   | -0.1560       | 0.0607             | -0.0329      | -0.0117           | -0.0046         | -0.1445      |
| 2     | br    | p4   | -0.1667       | 0.0796             | -0.0277      | -0.0195           | -0.0132         | -0.1475      |
| 2     | cl    | p1   | -0.1710       | 0.0734             | -0.0227      | -0.0079           | -0.0131         | -0.1413      |
| 2     | cl    | p2   | -0.1661       | 0.0669             | -0.0242      | -0.0056           | -0.0089         | -0.1378      |
| 2     | cl    | p3   | -0.1658       | 0.0658             | -0.0222      | -0.0063           | -0.0097         | -0.1381      |
| 2     | cl    | p4   | -0.1733       | 0.0749             | -0.0235      | -0.0077           | -0.0157         | -0.1453      |
| 3     | br    | p1   | -0.1646       | 0.0813             | -0.0281      | -0.0198           | -0.0106         | -0.1418      |
| 3     | br    | p2   | -0.1537       | 0.0580             | -0.0425      | -0.0090           | 0.0020          | -0.1453      |
| 3     | br    | p3   | -0.1549       | 0.0656             | -0.0293      | -0.0137           | -0.0037         | -0.1360      |
| 3     | br    | p4   | -0.1685       | 0.0802             | -0.0305      | -0.0194           | -0.0145         | -0.1527      |
| 3     | cl    | p1   | -0.1701       | 0.0742             | -0.0234      | -0.0082           | -0.0130         | -0.1405      |
| 3     | cl    | p2   | -0.1612       | 0.0641             | -0.0282      | -0.0043           | -0.0079         | -0.1374      |
| 3     | cl    | p3   | -0.1640       | 0.0638             | -0.0244      | -0.0063           | -0.0096         | -0.1405      |
| 3     | cl    | p4   | -0.1723       | 0.0763             | -0.0237      | -0.0083           | -0.0175         | -0.1454      |
| 4     | br    | p1   | -0.1631       | 0.0785             | -0.0328      | -0.0194           | -0.0127         | -0.1496      |
| 4     | br    | p2   | -0.1648       | 0.0662             | -0.0299      | -0.0114           | -0.0108         | -0.1507      |
| 4     | br    | p3   | -0.1530       | 0.0641             | -0.0335      | -0.0146           | -0.0051         | -0.1421      |
| 4     | br    | p4   | -0.1609       | 0.0819             | -0.0269      | -0.0206           | -0.0253         | -0.1518      |
| 4     | cl    | p1   | -0.1693       | 0.0747             | -0.0245      | -0.0080           | -0.0133         | -0.1404      |
| 4     | cl    | p2   | -0.1734       | 0.0701             | -0.0233      | -0.0053           | -0.0075         | -0.1394      |
| 4     | cl    | p3   | -0.1625       | 0.0638             | -0.0282      | -0.0057           | -0.0096         | -0.1422      |
| 4     | cl    | p4   | -0.1748       | 0.0768             | -0.0232      | -0.0083           | -0.0266         | -0.1560      |

*S12. EFP Interaction Energies of CnMIM cation and halide anion using VVO Approximation with 6-311++G(d,p) basis set. Units are in Hartree.*

| Chain | Anion | Conf | Electrostatic | Exchange Repulsion | Polarization | Dispersion(6,7,8) | Charge Transfer | Total Energy |
|-------|-------|------|---------------|--------------------|--------------|-------------------|-----------------|--------------|
| 1     | br    | p1   | -0.1702       | 0.0832             | -0.0251      | -0.0192           | -0.0019         | -0.1333      |
| 1     | br    | p2   | -0.1578       | 0.0582             | -0.0336      | -0.0099           | -0.0031         | -0.1462      |
| 1     | cl    | p1   | -0.1783       | 0.0777             | -0.0216      | -0.0079           | -0.0017         | -0.1318      |
| 1     | cl    | p2   | -0.1667       | 0.0634             | -0.0275      | -0.0033           | -0.0035         | -0.1377      |
| 2     | br    | p1   | -0.1631       | 0.0806             | -0.0260      | -0.0193           | -0.0018         | -0.1296      |
| 2     | br    | p2   | -0.1577       | 0.0611             | -0.0336      | -0.0108           | -0.0033         | -0.1444      |
| 2     | br    | p3   | -0.1560       | 0.0607             | -0.0329      | -0.0117           | -0.0030         | -0.1429      |
| 2     | br    | p4   | -0.1667       | 0.0796             | -0.0277      | -0.0195           | -0.0025         | -0.1368      |
| 2     | cl    | p1   | -0.1710       | 0.0734             | -0.0227      | -0.0079           | -0.0017         | -0.1299      |
| 2     | cl    | p2   | -0.1661       | 0.0669             | -0.0242      | -0.0056           | -0.0037         | -0.1326      |
| 2     | cl    | p3   | -0.1658       | 0.0658             | -0.0222      | -0.0063           | -0.0030         | -0.1314      |
| 2     | cl    | p4   | -0.1733       | 0.0749             | -0.0235      | -0.0077           | -0.0023         | -0.1319      |
| 3     | br    | p1   | -0.1646       | 0.0813             | -0.0281      | -0.0198           | -0.0015         | -0.1327      |
| 3     | br    | p2   | -0.1537       | 0.0580             | -0.0425      | -0.0090           | -0.0029         | -0.1502      |
| 3     | br    | p3   | -0.1549       | 0.0656             | -0.0293      | -0.0137           | -0.0023         | -0.1347      |
| 3     | br    | p4   | -0.1685       | 0.0802             | -0.0305      | -0.0194           | -0.0020         | -0.1402      |
| 3     | cl    | p1   | -0.1701       | 0.0742             | -0.0234      | -0.0082           | -0.0014         | -0.1289      |
| 3     | cl    | p2   | -0.1612       | 0.0641             | -0.0282      | -0.0043           | -0.0032         | -0.1328      |
| 3     | cl    | p3   | -0.1640       | 0.0638             | -0.0244      | -0.0063           | -0.0026         | -0.1335      |
| 3     | cl    | p4   | -0.1723       | 0.0763             | -0.0237      | -0.0083           | -0.0019         | -0.1297      |
| 4     | br    | p1   | -0.1631       | 0.0785             | -0.0328      | -0.0194           | -0.0016         | -0.1384      |
| 4     | br    | p2   | -0.1648       | 0.0662             | -0.0299      | -0.0114           | -0.0024         | -0.1422      |
| 4     | br    | p3   | -0.1530       | 0.0641             | -0.0335      | -0.0146           | -0.0022         | -0.1392      |
| 4     | br    | p4   | -0.1609       | 0.0819             | -0.0269      | -0.0206           | -0.0028         | -0.1293      |
| 4     | cl    | p1   | -0.1693       | 0.0747             | -0.0245      | -0.0080           | -0.0014         | -0.1285      |
| 4     | cl    | p2   | -0.1734       | 0.0701             | -0.0233      | -0.0053           | -0.0026         | -0.1345      |
| 4     | cl    | p3   | -0.1625       | 0.0638             | -0.0282      | -0.0057           | -0.0024         | -0.1350      |
| 4     | cl    | p4   | -0.1748       | 0.0768             | -0.0232      | -0.0083           | -0.0027         | -0.1321      |

*S13. EFP Interaction Energies of N-alkyl-N-methylpyrocinium (CnPyr) cation and TILA anion using canonical molecular orbitals with 6-311++G(3df2p) basis set. Units are in Hartree.*

| Chain | Anion | Conf | Electrostatic | Exchange Repulsion | Polarization | Dispersion(6,7,8) | Charge Transfer | Total Energy |
|-------|-------|------|---------------|--------------------|--------------|-------------------|-----------------|--------------|
| 1     | bf4   | p1   | -0.1407       | 0.0218             | -0.0149      | -0.0118           | -0.0021         | -0.1478      |
| 1     | bf4   | p2   | -0.1392       | 0.0216             | -0.0146      | -0.0104           | -0.0017         | -0.1442      |
| 1     | dca   | p1   | -0.1341       | 0.0282             | -0.0134      | -0.0142           | -0.0033         | -0.1368      |
| 1     | dca   | p2   | -0.1346       | 0.0273             | -0.0120      | -0.0150           | -0.0031         | -0.1375      |
| 1     | dca   | p3   | -0.1260       | 0.0266             | -0.0146      | -0.0130           | -0.0036         | -0.1306      |
| 1     | dca   | p4   | -0.1359       | 0.0279             | -0.0117      | -0.0147           | -0.0033         | -0.1377      |
| 1     | mes   | p1   | -0.1550       | 0.0325             | -0.0212      | -0.0142           | -0.0066         | -0.1644      |
| 1     | mes   | p2   | -0.1539       | 0.0363             | -0.0220      | -0.0099           | -0.0064         | -0.1559      |
| 1     | ntf2  | p1   | -0.1212       | 0.0210             | -0.0130      | -0.0153           | -0.0028         | -0.1313      |
| 1     | ntf2  | p2   | -0.1205       | 0.0198             | -0.0142      | -0.0119           | -0.0020         | -0.1288      |
| 1     | ntf2  | p3   | -0.1222       | 0.0238             | -0.0135      | -0.0142           | -0.0028         | -0.1288      |
| 1     | ntf2  | p5   | -0.1219       | 0.0199             | -0.0141      | -0.0121           | -0.0017         | -0.1299      |
| 1     | pf6   | p1   | -0.1309       | 0.0185             | -0.0126      | -0.0111           | -0.0028         | -0.1388      |
| 1     | pf6   | p2   | -0.1298       | 0.0152             | -0.0110      | -0.0074           | -0.0026         | -0.1355      |
| 1     | tos   | p1   | -0.1630       | 0.0315             | -0.0220      | -0.0128           | -0.0058         | -0.1721      |
| 1     | tos   | p2   | -0.1447       | 0.0298             | -0.0208      | -0.0113           | -0.0048         | -0.1518      |
| 2     | bf4   | p1   | -0.1380       | 0.0216             | -0.0154      | -0.0120           | -0.0021         | -0.1459      |
| 2     | bf4   | p2   | -0.1342       | 0.0222             | -0.0142      | -0.0104           | -0.0018         | -0.1383      |
| 2     | bf4   | p3   | -0.1377       | 0.0224             | -0.0151      | -0.0105           | -0.0018         | -0.1428      |
| 2     | dca   | p1   | -0.1312       | 0.0279             | -0.0136      | -0.0143           | -0.0033         | -0.1345      |
| 2     | dca   | p2   | -0.1314       | 0.0273             | -0.0121      | -0.0151           | -0.0035         | -0.1347      |
| 2     | dca   | p3   | -0.1322       | 0.0273             | -0.0124      | -0.0152           | -0.0033         | -0.1357      |
| 2     | mes   | p1   | -0.1527       | 0.0317             | -0.0215      | -0.0148           | -0.0065         | -0.1638      |
| 2     | mes   | p2   | -0.1470       | 0.0301             | -0.0195      | -0.0128           | -0.0054         | -0.1547      |
| 2     | mes   | p3   | -0.1521       | 0.0345             | -0.0218      | -0.0115           | -0.0065         | -0.1573      |
| 2     | ntf2  | p1   | -0.1186       | 0.0193             | -0.0126      | -0.0158           | -0.0025         | -0.1301      |
| 2     | ntf2  | p2   | -0.1188       | 0.0205             | -0.0143      | -0.0126           | -0.0019         | -0.1271      |
| 2     | ntf2  | p3   | -0.1167       | 0.0200             | -0.0120      | -0.0149           | -0.0024         | -0.1261      |
| 2     | ntf2  | p4   | -0.1196       | 0.0224             | -0.0133      | -0.0143           | -0.0027         | -0.1276      |
| 2     | ntf2  | p5   | -0.1171       | 0.0192             | -0.0130      | -0.0131           | -0.0017         | -0.1257      |
| 2     | ntf2  | p6   | -0.1181       | 0.0195             | -0.0139      | -0.0121           | -0.0016         | -0.1261      |
| 2     | pf6   | p1   | -0.1285       | 0.0194             | -0.0127      | -0.0111           | -0.0027         | -0.1356      |
| 2     | pf6   | p2   | -0.1243       | 0.0183             | -0.0120      | -0.0100           | -0.0025         | -0.1305      |
| 2     | pf6   | p3   | -0.1279       | 0.0185             | -0.0127      | -0.0100           | -0.0027         | -0.1349      |
| 2     | tos   | p1   | -0.1495       | 0.0308             | -0.0220      | -0.0133           | -0.0062         | -0.1601      |
| 2     | tos   | p2   | -0.1496       | 0.0289             | -0.0199      | -0.0116           | -0.0047         | -0.1569      |
| 3     | bf4   | p1   | -0.1360       | 0.0212             | -0.0157      | -0.0123           | -0.0021         | -0.1449      |
| 3     | bf4   | p2   | -0.1318       | 0.0215             | -0.0147      | -0.0104           | -0.0018         | -0.1372      |
| 3     | bf4   | p3   | -0.1367       | 0.0223             | -0.0154      | -0.0107           | -0.0019         | -0.1425      |
| 3     | dca   | p1   | -0.1295       | 0.0283             | -0.0134      | -0.0150           | -0.0037         | -0.1332      |
| 3     | dca   | p2   | -0.1300       | 0.0271             | -0.0123      | -0.0152           | -0.0035         | -0.1339      |
| 3     | dca   | p3   | -0.1192       | 0.0237             | -0.0129      | -0.0126           | -0.0031         | -0.1240      |
| 3     | dca   | p4   | -0.1279       | 0.0255             | -0.0128      | -0.0146           | -0.0009         | -0.1306      |
| 3     | dca   | p5   | -0.1312       | 0.0263             | -0.0126      | -0.0153           | -0.0009         | -0.1337      |
| 3     | mes   | p1   | -0.1507       | 0.0305             | -0.0217      | -0.0154           | -0.0065         | -0.1638      |
| 3     | mes   | p2   | -0.1452       | 0.0299             | -0.0200      | -0.0127           | -0.0055         | -0.1535      |
| 3     | mes   | p3   | -0.1506       | 0.0344             | -0.0222      | -0.0119           | -0.0064         | -0.1567      |
| 3     | ntf2  | p1   | -0.1178       | 0.0197             | -0.0129      | -0.0165           | -0.0025         | -0.1300      |
| 3     | ntf2  | p2   | -0.1165       | 0.0211             | -0.0142      | -0.0122           | -0.0020         | -0.1238      |
| 3     | ntf2  | p3   | -0.1157       | 0.0205             | -0.0123      | -0.0150           | -0.0025         | -0.1250      |
| 3     | ntf2  | p4   | -0.1194       | 0.0227             | -0.0136      | -0.0150           | -0.0028         | -0.1282      |
| 3     | ntf2  | p5   | -0.1159       | 0.0188             | -0.0130      | -0.0131           | -0.0017         | -0.1248      |
| 3     | ntf2  | p6   | -0.1168       | 0.0194             | -0.0139      | -0.0127           | -0.0016         | -0.1256      |
| 3     | pf6   | p1   | -0.1273       | 0.0183             | -0.0132      | -0.0118           | -0.0028         | -0.1368      |
| 3     | pf6   | p2   | -0.1224       | 0.0180             | -0.0122      | -0.0099           | -0.0025         | -0.1290      |
| 3     | pf6   | p3   | -0.1270       | 0.0184             | -0.0129      | -0.0103           | -0.0028         | -0.1346      |
| 3     | tos   | p1   | -0.1478       | 0.0298             | -0.0221      | -0.0142           | -0.0056         | -0.1599      |
| 3     | tos   | p2   | -0.1541       | 0.0285             | -0.0204      | -0.0115           | -0.0046         | -0.1620      |
| 4     | bf4   | p1   | -0.1349       | 0.0212             | -0.0159      | -0.0124           | -0.0020         | -0.1439      |
| 4     | bf4   | p2   | -0.1301       | 0.0214             | -0.0151      | -0.0105           | -0.0016         | -0.1359      |
| 4     | bf4   | p3   | -0.1357       | 0.0226             | -0.0156      | -0.0109           | -0.0019         | -0.1415      |
| 4     | dca   | p1   | -0.1263       | 0.0241             | -0.0119      | -0.0145           | -0.0035         | -0.1321      |
| 4     | dca   | p2   | -0.1293       | 0.0270             | -0.0125      | -0.0152           | -0.0035         | -0.1335      |
| 4     | dca   | p3   | -0.1285       | 0.0274             | -0.0134      | -0.0154           | -0.0035         | -0.1335      |
| 4     | dca   | p4   | -0.1313       | 0.0272             | -0.0122      | -0.0151           | -0.0037         | -0.1351      |
| 4     | dca   | p5   | -0.1293       | 0.0270             | -0.0126      | -0.0154           | -0.0036         | -0.1339      |
| 4     | mes   | p1   | -0.1492       | 0.0304             | -0.0217      | -0.0155           | -0.0062         | -0.1622      |
| 4     | mes   | p2   | -0.1435       | 0.0296             | -0.0204      | -0.0130           | -0.0052         | -0.1524      |
| 4     | mes   | p3   | -0.1493       | 0.0344             | -0.0224      | -0.0120           | -0.0065         | -0.1557      |
| 4     | ntf2  | p1   | -0.1171       | 0.0201             | -0.0132      | -0.0166           | -0.0024         | -0.1293      |
| 4     | ntf2  | p2   | -0.1182       | 0.0198             | -0.0144      | -0.0145           | -0.0018         | -0.1291      |
| 4     | ntf2  | p3   | -0.1161       | 0.0215             | -0.0128      | -0.0154           | -0.0025         | -0.1253      |
| 4     | ntf2  | p4   | -0.1176       | 0.0226             | -0.0137      | -0.0154           | -0.0028         | -0.1269      |
| 4     | ntf2  | p5   | -0.1155       | 0.0186             | -0.0131      | -0.0134           | -0.0016         | -0.1250      |
| 4     | ntf2  | p6   | -0.1162       | 0.0195             | -0.0141      | -0.0133           | -0.0018         | -0.1258      |
| 4     | pf6   | p1   | -0.1267       | 0.0184             | -0.0133      | -0.0119           | -0.0027         | -0.1362      |
| 4     | pf6   | p2   | -0.1210       | 0.0179             | -0.0124      | -0.0101           | -0.0024         | -0.1280      |
| 4     | pf6   | p3   | -0.1267       | 0.0184             | -0.0130      | -0.0105           | -0.0028         | -0.1345      |
| 4     | tos   | p1   | -0.1429       | 0.0298             | -0.0216      | -0.0144           | -0.0058         | -0.1549      |
| 4     | tos   | p2   | -0.1368       | 0.0283             | -0.0202      | -0.0120           | -0.0048         | -0.1454      |

*S14. EFP Interaction Energies of CnPyr cation and TILA anion using VVO Approximation  
with 6-311++G(3df2p) basis set. Units are in Hartree.*

| Chain | Anion | Conf | Electrostatic | Exchange Repulsion | Polarization | Dispersion(6,7,8) | Charge Transfer | Total Energy |
|-------|-------|------|---------------|--------------------|--------------|-------------------|-----------------|--------------|
| 1     | bf4   | p1   | -0.1407       | 0.0218             | -0.0149      | -0.0118           | -0.0005         | -0.1462      |
| 1     | bf4   | p2   | -0.1392       | 0.0216             | -0.0146      | -0.0104           | -0.0005         | -0.1430      |
| 1     | dca   | p1   | -0.1341       | 0.0282             | -0.0134      | -0.0142           | -0.0016         | -0.1351      |
| 1     | dca   | p2   | -0.1346       | 0.0273             | -0.0120      | -0.0150           | -0.0015         | -0.1358      |
| 1     | dca   | p3   | -0.1260       | 0.0266             | -0.0146      | -0.0130           | -0.0017         | -0.1287      |
| 1     | dca   | p4   | -0.1359       | 0.0279             | -0.0117      | -0.0147           | -0.0010         | -0.1354      |
| 1     | mes   | p1   | -0.1550       | 0.0325             | -0.0212      | -0.0142           | -0.0019         | -0.1597      |
| 1     | mes   | p2   | -0.1539       | 0.0363             | -0.0220      | -0.0099           | -0.0022         | -0.1518      |
| 1     | ntf2  | p1   | -0.1212       | 0.0210             | -0.0130      | -0.0153           | -0.0011         | -0.1296      |
| 1     | ntf2  | p2   | -0.1205       | 0.0198             | -0.0142      | -0.0119           | 0.0000          | -0.1268      |
| 1     | ntf2  | p3   | -0.1222       | 0.0238             | -0.0135      | -0.0142           | -0.0012         | -0.1273      |
| 1     | ntf2  | p5   | -0.1219       | 0.0199             | -0.0141      | -0.0121           | 0.0000          | -0.1282      |
| 1     | pf6   | p1   | -0.1309       | 0.0185             | -0.0126      | -0.0111           | -0.0009         | -0.1370      |
| 1     | pf6   | p2   | -0.1298       | 0.0152             | -0.0110      | -0.0074           | -0.0009         | -0.1338      |
| 1     | tos   | p1   | -0.1630       | 0.0315             | -0.0220      | -0.0128           | -0.0018         | -0.1681      |
| 1     | tos   | p2   | -0.1447       | 0.0298             | -0.0208      | -0.0113           | -0.0018         | -0.1489      |
| 2     | bf4   | p1   | -0.1380       | 0.0216             | -0.0154      | -0.0120           | -0.0005         | -0.1442      |
| 2     | bf4   | p2   | -0.1342       | 0.0222             | -0.0142      | -0.0104           | -0.0005         | -0.1371      |
| 2     | bf4   | p3   | -0.1377       | 0.0224             | -0.0151      | -0.0105           | -0.0005         | -0.1415      |
| 2     | dca   | p1   | -0.1312       | 0.0279             | -0.0136      | -0.0143           | -0.0015         | -0.1327      |
| 2     | dca   | p2   | -0.1314       | 0.0273             | -0.0121      | -0.0151           | -0.0017         | -0.1329      |
| 2     | dca   | p3   | -0.1322       | 0.0273             | -0.0124      | -0.0152           | -0.0015         | -0.1339      |
| 2     | mes   | p1   | -0.1527       | 0.0317             | -0.0215      | -0.0148           | -0.0018         | -0.1591      |
| 2     | mes   | p2   | -0.1470       | 0.0301             | -0.0195      | -0.0128           | -0.0017         | -0.1509      |
| 2     | mes   | p3   | -0.1521       | 0.0345             | -0.0218      | -0.0115           | -0.0021         | -0.1530      |
| 2     | ntf2  | p1   | -0.1186       | 0.0193             | -0.0126      | -0.0158           | 0.0000          | -0.1276      |
| 2     | ntf2  | p2   | -0.1188       | 0.0205             | -0.0143      | -0.0126           | 0.0000          | -0.1252      |
| 2     | ntf2  | p3   | -0.1167       | 0.0200             | -0.0120      | -0.0149           | -0.0009         | -0.1246      |
| 2     | ntf2  | p4   | -0.1196       | 0.0224             | -0.0133      | -0.0143           | -0.0012         | -0.1261      |
| 2     | ntf2  | p5   | -0.1171       | 0.0192             | -0.0130      | -0.0131           | 0.0000          | -0.1240      |
| 2     | ntf2  | p6   | -0.1181       | 0.0195             | -0.0139      | -0.0121           | 0.0000          | -0.1246      |
| 2     | pf6   | p1   | -0.1285       | 0.0194             | -0.0127      | -0.0111           | 0.0000          | -0.1329      |
| 2     | pf6   | p2   | -0.1243       | 0.0183             | -0.0120      | -0.0100           | -0.0008         | -0.1289      |
| 2     | pf6   | p3   | -0.1279       | 0.0185             | -0.0127      | -0.0100           | -0.0009         | -0.1331      |
| 2     | tos   | p1   | -0.1495       | 0.0308             | -0.0220      | -0.0133           | -0.0019         | -0.1558      |
| 2     | tos   | p2   | -0.1495       | 0.0289             | -0.0199      | -0.0116           | -0.0017         | -0.1539      |
| 3     | bf4   | p1   | -0.1360       | 0.0212             | -0.0157      | -0.0123           | -0.0004         | -0.1433      |
| 3     | bf4   | p2   | -0.1318       | 0.0215             | -0.0147      | -0.0104           | -0.0005         | -0.1359      |
| 3     | bf4   | p3   | -0.1367       | 0.0223             | -0.0154      | -0.0107           | -0.0005         | -0.1411      |
| 3     | dca   | p1   | -0.1295       | 0.0283             | -0.0134      | -0.0150           | -0.0015         | -0.1310      |
| 3     | dca   | p2   | -0.1300       | 0.0271             | -0.0123      | -0.0152           | -0.0017         | -0.1321      |
| 3     | dca   | p3   | -0.1192       | 0.0237             | -0.0129      | -0.0126           | -0.0014         | -0.1224      |
| 3     | dca   | p4   | -0.1279       | 0.0255             | -0.0128      | -0.0146           | -0.0009         | -0.1306      |
| 3     | dca   | p5   | -0.1312       | 0.0263             | -0.0126      | -0.0153           | -0.0009         | -0.1337      |
| 3     | mes   | p1   | -0.1507       | 0.0305             | -0.0217      | -0.0154           | -0.0017         | -0.1590      |
| 3     | mes   | p2   | -0.1452       | 0.0299             | -0.0200      | -0.0127           | -0.0017         | -0.1497      |
| 3     | mes   | p3   | -0.1506       | 0.0344             | -0.0222      | -0.0119           | -0.0021         | -0.1524      |
| 3     | ntf2  | p1   | -0.1178       | 0.0197             | -0.0129      | -0.0165           | 0.0000          | -0.1275      |
| 3     | ntf2  | p2   | -0.1165       | 0.0211             | -0.0142      | -0.0122           | 0.0000          | -0.1218      |
| 3     | ntf2  | p3   | -0.1157       | 0.0205             | -0.0123      | -0.0150           | -0.0009         | -0.1235      |
| 3     | ntf2  | p4   | -0.1194       | 0.0227             | -0.0136      | -0.0150           | 0.0000          | -0.1254      |
| 3     | ntf2  | p5   | -0.1159       | 0.0188             | -0.0130      | -0.0131           | 0.0000          | -0.1231      |
| 3     | ntf2  | p6   | -0.1168       | 0.0194             | -0.0139      | -0.0127           | 0.0000          | -0.1240      |
| 3     | pf6   | p1   | -0.1273       | 0.0183             | -0.0132      | -0.0118           | -0.0009         | -0.1349      |
| 3     | pf6   | p2   | -0.1224       | 0.0180             | -0.0122      | -0.0099           | -0.0008         | -0.1273      |
| 3     | pf6   | p3   | -0.1270       | 0.0184             | -0.0129      | -0.0103           | 0.0000          | -0.1318      |
| 3     | tos   | p1   | -0.1478       | 0.0298             | -0.0221      | -0.0142           | -0.0018         | -0.1561      |
| 3     | tos   | p2   | -0.1541       | 0.0285             | -0.0204      | -0.0115           | -0.0017         | -0.1591      |
| 4     | bf4   | p1   | -0.1349       | 0.0212             | -0.0159      | -0.0124           | -0.0004         | -0.1423      |
| 4     | bf4   | p2   | -0.1301       | 0.0214             | -0.0151      | -0.0105           | -0.0005         | -0.1347      |
| 4     | bf4   | p3   | -0.1357       | 0.0226             | -0.0156      | -0.0109           | -0.0005         | -0.1401      |
| 4     | dca   | p1   | -0.1263       | 0.0241             | -0.0119      | -0.0145           | 0.0000          | -0.1286      |
| 4     | dca   | p2   | -0.1293       | 0.0270             | -0.0125      | -0.0152           | -0.0016         | -0.1316      |
| 4     | dca   | p3   | -0.1285       | 0.0274             | -0.0134      | -0.0154           | -0.0013         | -0.1313      |
| 4     | dca   | p4   | -0.1313       | 0.0272             | -0.0122      | -0.0151           | 0.0000          | -0.1314      |
| 4     | dca   | p5   | -0.1293       | 0.0270             | -0.0126      | -0.0154           | -0.0014         | -0.1318      |
| 4     | mes   | p1   | -0.1492       | 0.0304             | -0.0217      | -0.0155           | -0.0017         | -0.1576      |
| 4     | mes   | p2   | -0.1435       | 0.0296             | -0.0204      | -0.0130           | -0.0016         | -0.1488      |
| 4     | mes   | p3   | -0.1493       | 0.0344             | -0.0224      | -0.0120           | -0.0020         | -0.1513      |
| 4     | ntf2  | p1   | -0.1171       | 0.0201             | -0.0132      | -0.0166           | 0.0000          | -0.1269      |
| 4     | ntf2  | p2   | -0.1182       | 0.0198             | -0.0144      | -0.0145           | 0.0000          | -0.1273      |
| 4     | ntf2  | p3   | -0.1161       | 0.0215             | -0.0128      | -0.0154           | -0.0010         | -0.1238      |
| 4     | ntf2  | p4   | -0.1176       | 0.0226             | -0.0137      | -0.0154           | -0.0011         | -0.1253      |
| 4     | ntf2  | p5   | -0.1155       | 0.0186             | -0.0131      | -0.0134           | 0.0000          | -0.1234      |
| 4     | ntf2  | p6   | -0.1162       | 0.0195             | -0.0141      | -0.0133           | 0.0000          | -0.1240      |
| 4     | pf6   | p1   | -0.1267       | 0.0184             | -0.0133      | -0.0119           | -0.0008         | -0.1343      |
| 4     | pf6   | p2   | -0.1210       | 0.0179             | -0.0124      | -0.0101           | -0.0008         | -0.1264      |
| 4     | pf6   | p3   | -0.1267       | 0.0184             | -0.0130      | -0.0105           | 0.0000          | -0.1318      |
| 4     | tos   | p1   | -0.1429       | 0.0298             | -0.0216      | -0.0144           | -0.0017         | -0.1508      |
| 4     | tos   | p2   | -0.1368       | 0.0283             | -0.0202      | -0.0120           | -0.0017         | -0.1423      |

*S15. EFP Interaction Energies of CnPyr cation and halide anion using canonical molecular orbitals with 6-311++G(3df2p) basis set. Units are in Hartree.*

| Chain | Anion | Conf | Electrostatic | Exchange Repulsion | Polarization | Dispersion(6,7,8) | Charge Transfer | Total Energy |
|-------|-------|------|---------------|--------------------|--------------|-------------------|-----------------|--------------|
| 1     | br    | p1   | -0.1545       | 0.0569             | -0.0329      | -0.0131           | -0.0088         | -0.1523      |
| 1     | br    | p2   | -0.1537       | 0.0569             | -0.0284      | -0.0123           | -0.0071         | -0.1446      |
| 1     | cl    | p1   | -0.1575       | 0.0516             | -0.0276      | -0.0111           | -0.0086         | -0.1532      |
| 1     | cl    | p2   | -0.1573       | 0.0519             | -0.0252      | -0.0104           | -0.0061         | -0.1473      |
| 2     | br    | p1   | -0.1520       | 0.0572             | -0.0335      | -0.0135           | -0.0083         | -0.1501      |
| 2     | br    | p2   | -0.1477       | 0.0564             | -0.0292      | -0.0122           | -0.0069         | -0.1397      |
| 2     | br    | p3   | -0.1517       | 0.0590             | -0.0267      | -0.0131           | -0.0053         | -0.1377      |
| 2     | cl    | p1   | -0.1550       | 0.0514             | -0.0272      | -0.0112           | -0.0088         | -0.1509      |
| 2     | cl    | p2   | -0.1503       | 0.0500             | -0.0262      | -0.0102           | -0.0065         | -0.1432      |
| 2     | cl    | p3   | -0.1546       | 0.0503             | -0.0267      | -0.0106           | -0.0066         | -0.1482      |
| 3     | br    | p1   | -0.1630       | 0.0806             | -0.0292      | -0.0204           | -0.0247         | -0.1567      |
| 3     | br    | p2   | -0.1452       | 0.0542             | -0.0294      | -0.0119           | -0.0043         | -0.1366      |
| 3     | br    | p3   | -0.1508       | 0.0590             | -0.0270      | -0.0129           | -0.0060         | -0.1377      |
| 3     | cl    | p1   | -0.1529       | 0.0508             | -0.0284      | -0.0115           | -0.0093         | -0.1512      |
| 3     | cl    | p2   | -0.1488       | 0.0489             | -0.0281      | -0.0100           | -0.0068         | -0.1448      |
| 3     | cl    | p3   | -0.1530       | 0.0519             | -0.0251      | -0.0105           | -0.0074         | -0.1441      |
| 4     | br    | p1   | -0.1495       | 0.0592             | -0.0309      | -0.0139           | -0.0103         | -0.1454      |
| 4     | br    | p2   | -0.1423       | 0.0552             | -0.0290      | -0.0120           | -0.0059         | -0.1340      |
| 4     | br    | p3   | -0.1496       | 0.0568             | -0.0296      | -0.0129           | -0.0096         | -0.1449      |
| 4     | cl    | p1   | -0.1518       | 0.0505             | -0.0293      | -0.0114           | -0.0091         | -0.1511      |
| 4     | cl    | p2   | -0.1473       | 0.0493             | -0.0277      | -0.0106           | -0.0071         | -0.1433      |
| 4     | cl    | p3   | -0.1513       | 0.0512             | -0.0256      | -0.0107           | -0.0080         | -0.1445      |

*S16. EFP Interaction Energies of CnPyr cation and halide anion using VVO Approximation with 6-311++G(3df2p) basis set. Units are in Hartree.*

| Chain | Anion | Conf | Electrostatic | Exchange Repulsion | Polarization | Dispersion(6,7,8) | Charge Transfer | Total Energy |
|-------|-------|------|---------------|--------------------|--------------|-------------------|-----------------|--------------|
| 1     | br    | p1   | -0.1545       | 0.0569             | -0.0329      | -0.0131           | -0.0022         | -0.1457      |
| 1     | br    | p2   | -0.1537       | 0.0569             | -0.0284      | -0.0123           | -0.0019         | -0.1394      |
| 1     | cl    | p1   | -0.1575       | 0.0516             | -0.0276      | -0.0111           | -0.0021         | -0.1467      |
| 1     | cl    | p2   | -0.1573       | 0.0519             | -0.0252      | -0.0104           | -0.0018         | -0.1429      |
| 2     | br    | p1   | -0.1520       | 0.0572             | -0.0335      | -0.0135           | -0.0023         | -0.1441      |
| 2     | br    | p2   | -0.1477       | 0.0564             | -0.0292      | -0.0122           | -0.0026         | -0.1354      |
| 2     | br    | p3   | -0.1517       | 0.0590             | -0.0267      | -0.0131           | -0.0028         | -0.1353      |
| 2     | cl    | p1   | -0.1550       | 0.0514             | -0.0272      | -0.0112           | -0.0021         | -0.1441      |
| 2     | cl    | p2   | -0.1503       | 0.0500             | -0.0262      | -0.0102           | -0.0018         | -0.1384      |
| 2     | cl    | p3   | -0.1546       | 0.0503             | -0.0267      | -0.0106           | -0.0025         | -0.1441      |
| 3     | br    | p1   | -0.1630       | 0.0806             | -0.0292      | -0.0204           | -0.0030         | -0.1351      |
| 3     | br    | p2   | -0.1452       | 0.0542             | -0.0294      | -0.0119           | -0.0017         | -0.1341      |
| 3     | br    | p3   | -0.1508       | 0.0590             | -0.0270      | -0.0129           | -0.0020         | -0.1337      |
| 3     | cl    | p1   | -0.1529       | 0.0508             | -0.0284      | -0.0115           | -0.0020         | -0.1440      |
| 3     | cl    | p2   | -0.1488       | 0.0489             | -0.0281      | -0.0100           | -0.0017         | -0.1398      |
| 3     | cl    | p3   | -0.1530       | 0.0519             | -0.0251      | -0.0105           | -0.0017         | -0.1385      |
| 4     | br    | p1   | -0.1495       | 0.0592             | -0.0309      | -0.0139           | -0.0020         | -0.1371      |
| 4     | br    | p2   | -0.1423       | 0.0552             | -0.0290      | -0.0120           | -0.0020         | -0.1301      |
| 4     | br    | p3   | -0.1496       | 0.0568             | -0.0296      | -0.0129           | -0.0020         | -0.1373      |
| 4     | cl    | p1   | -0.1518       | 0.0505             | -0.0293      | -0.0114           | -0.0018         | -0.1438      |
| 4     | cl    | p2   | -0.1473       | 0.0493             | -0.0277      | -0.0106           | -0.0018         | -0.1380      |
| 4     | cl    | p3   | -0.1513       | 0.0512             | -0.0256      | -0.0107           | -0.0017         | -0.1383      |

*S17. EFP Interaction Energies of N-alkyl-N-methylpyrodidinium (CnPyr) cation and TILA anion using canonical molecular orbitals with 6-311++G(d,p) basis set. Units are in Hartree.*

| Chain | Anion | Conf | Electrostatic | Exchange Repulsion | Polarization | Dispersion(6,7,8) | Charge Transfer | Total Energy |
|-------|-------|------|---------------|--------------------|--------------|-------------------|-----------------|--------------|
| 1     | bf4   | p1   | -0.1400       | 0.0189             | -0.0129      | -0.0094           | -0.0051         | -0.1485      |
| 1     | bf4   | p2   | -0.1388       | 0.0186             | -0.0126      | -0.0082           | -0.0045         | -0.1455      |
| 1     | dca   | p1   | -0.1321       | 0.0255             | -0.0125      | -0.0123           | -0.0032         | -0.1346      |
| 1     | dca   | p2   | -0.1344       | 0.0251             | -0.0109      | -0.0131           | -0.0022         | -0.1354      |
| 1     | dca   | p3   | -0.1275       | 0.0241             | -0.0144      | -0.0115           | -0.0043         | -0.1336      |
| 1     | dca   | p4   | -0.1352       | 0.0256             | -0.0104      | -0.0129           | -0.0023         | -0.1351      |
| 1     | mes   | p1   | -0.1569       | 0.0288             | -0.0200      | -0.0117           | -0.0068         | -0.1666      |
| 1     | mes   | p2   | -0.1566       | 0.0326             | -0.0209      | -0.0077           | -0.0067         | -0.1594      |
| 1     | ntf2  | p1   | -0.1245       | 0.0157             | -0.0125      | -0.0134           | -0.0027         | -0.1374      |
| 1     | ntf2  | p2   | -0.1207       | 0.0162             | -0.0143      | -0.0097           | -0.0015         | -0.1300      |
| 1     | ntf2  | p3   | -0.1242       | 0.0181             | -0.0131      | -0.0125           | -0.0028         | -0.1345      |
| 1     | ntf2  | p5   | -0.1227       | 0.0159             | -0.0143      | -0.0099           | -0.0012         | -0.1321      |
| 1     | pf6   | p1   | -0.1307       | 0.0156             | -0.0112      | -0.0083           | -0.0028         | -0.1374      |
| 1     | pf6   | p2   | -0.1298       | 0.0152             | -0.0110      | -0.0074           | -0.0026         | -0.1355      |
| 1     | tos   | p1   | -0.2004       | 0.0277             | -0.0191      | -0.0106           | -0.0077         | -0.2101      |
| 1     | tos   | p2   | -0.1741       | 0.0264             | -0.0204      | -0.0094           | -0.0062         | -0.1838      |
| 2     | bf4   | p1   | -0.1379       | 0.0188             | -0.0135      | -0.0095           | -0.0053         | -0.1474      |
| 2     | bf4   | p2   | -0.1348       | 0.0192             | -0.0125      | -0.0082           | -0.0048         | -0.1411      |
| 2     | bf4   | p3   | -0.1375       | 0.0193             | -0.0132      | -0.0083           | -0.0051         | -0.1447      |
| 2     | dca   | p1   | -0.1297       | 0.0254             | -0.0126      | -0.0124           | -0.0033         | -0.1326      |
| 2     | dca   | p2   | -0.1308       | 0.0243             | -0.0106      | -0.0131           | -0.0024         | -0.1327      |
| 2     | dca   | p3   | -0.1322       | 0.0251             | -0.0111      | -0.0133           | -0.0024         | -0.1339      |
| 2     | mes   | p1   | -0.1542       | 0.0280             | -0.0205      | -0.0123           | -0.0069         | -0.1658      |
| 2     | mes   | p2   | -0.1489       | 0.0266             | -0.0186      | -0.0105           | -0.0055         | -0.1568      |
| 2     | mes   | p3   | -0.1545       | 0.0309             | -0.0206      | -0.0093           | -0.0067         | -0.1603      |
| 2     | ntf2  | p1   | -0.1212       | 0.0143             | -0.0122      | -0.0138           | -0.0022         | -0.1351      |
| 2     | ntf2  | p2   | -0.1184       | 0.0170             | -0.0145      | -0.0103           | -0.0015         | -0.1277      |
| 2     | ntf2  | p3   | -0.1189       | 0.0145             | -0.0115      | -0.0131           | -0.0020         | -0.1309      |
| 2     | ntf2  | p4   | -0.1230       | 0.0167             | -0.0130      | -0.0126           | -0.0027         | -0.1345      |
| 2     | ntf2  | p5   | -0.1182       | 0.0153             | -0.0130      | -0.0109           | -0.0012         | -0.1280      |
| 2     | ntf2  | p6   | -0.1182       | 0.0157             | -0.0144      | -0.0099           | -0.0012         | -0.1279      |
| 2     | pf6   | p1   | -0.1290       | 0.0166             | -0.0115      | -0.0082           | -0.0029         | -0.1350      |
| 2     | pf6   | p2   | -0.1249       | 0.0156             | -0.0107      | -0.0074           | -0.0025         | -0.1299      |
| 2     | pf6   | p3   | -0.1284       | 0.0155             | -0.0113      | -0.0075           | -0.0028         | -0.1344      |
| 2     | tos   | p1   | -0.1753       | 0.0272             | -0.0194      | -0.0112           | -0.0072         | -0.1859      |
| 2     | tos   | p2   | -0.1869       | 0.0257             | -0.0178      | -0.0096           | -0.0061         | -0.1948      |
| 3     | bf4   | p1   | -0.1364       | 0.0184             | -0.0139      | -0.0097           | -0.0051         | -0.1467      |
| 3     | bf4   | p2   | -0.1336       | 0.0184             | -0.0129      | -0.0082           | -0.0047         | -0.1410      |
| 3     | bf4   | p3   | -0.1365       | 0.0192             | -0.0133      | -0.0085           | -0.0050         | -0.1442      |
| 3     | dca   | p1   | -0.1283       | 0.0254             | -0.0118      | -0.0130           | -0.0031         | -0.1308      |
| 3     | dca   | p2   | -0.1303       | 0.0241             | -0.0109      | -0.0132           | -0.0023         | -0.1326      |
| 3     | dca   | p3   | -0.1220       | 0.0207             | -0.0123      | -0.0110           | -0.0034         | -0.1280      |
| 3     | dca   | p4   | -0.1279       | 0.0255             | -0.0128      | -0.0146           | -0.0009         | -0.1306      |
| 3     | dca   | p5   | -0.1312       | 0.0263             | -0.0126      | -0.0153           | -0.0009         | -0.1337      |
| 3     | mes   | p1   | -0.1517       | 0.0270             | -0.0206      | -0.0128           | -0.0064         | -0.1646      |
| 3     | mes   | p2   | -0.1476       | 0.0263             | -0.0190      | -0.0104           | -0.0054         | -0.1560      |
| 3     | mes   | p3   | -0.1526       | 0.0308             | -0.0207      | -0.0096           | -0.0063         | -0.1585      |
| 3     | ntf2  | p1   | -0.1208       | 0.0144             | -0.0127      | -0.0144           | -0.0022         | -0.1357      |
| 3     | ntf2  | p2   | -0.1162       | 0.0177             | -0.0144      | -0.0098           | -0.0014         | -0.1241      |
| 3     | ntf2  | p3   | -0.1181       | 0.0149             | -0.0117      | -0.0131           | -0.0020         | -0.1301      |
| 3     | ntf2  | p4   | -0.1181       | 0.0168             | -0.0131      | -0.0131           | -0.0025         | -0.1300      |
| 3     | ntf2  | p5   | -0.1184       | 0.0149             | -0.0129      | -0.0108           | -0.0010         | -0.1283      |
| 3     | ntf2  | p6   | -0.1162       | 0.0160             | -0.0140      | -0.0104           | -0.0011         | -0.1256      |
| 3     | pf6   | p1   | -0.1277       | 0.0155             | -0.0119      | -0.0088           | -0.0029         | -0.1358      |
| 3     | pf6   | p2   | -0.1232       | 0.0152             | -0.0109      | -0.0073           | -0.0025         | -0.1286      |
| 3     | pf6   | p3   | -0.1267       | 0.0155             | -0.0114      | -0.0077           | -0.0027         | -0.1330      |
| 3     | tos   | p1   | -0.1864       | 0.0263             | -0.0207      | -0.0120           | -0.0073         | -0.2000      |
| 3     | tos   | p2   | -0.1795       | 0.0253             | -0.0183      | -0.0095           | -0.0062         | -0.1884      |
| 4     | bf4   | p1   | -0.1361       | 0.0184             | -0.0142      | -0.0098           | -0.0051         | -0.1468      |
| 4     | bf4   | p2   | -0.1313       | 0.0184             | -0.0133      | -0.0083           | -0.0047         | -0.1391      |
| 4     | bf4   | p3   | -0.1359       | 0.0195             | -0.0136      | -0.0086           | -0.0053         | -0.1440      |
| 4     | dca   | p1   | -0.1271       | 0.0226             | -0.0112      | -0.0127           | -0.0019         | -0.1303      |
| 4     | dca   | p2   | -0.1280       | 0.0239             | -0.0110      | -0.0132           | -0.0022         | -0.1306      |
| 4     | dca   | p3   | -0.1281       | 0.0243             | -0.0119      | -0.0134           | -0.0028         | -0.1319      |
| 4     | dca   | p4   | -0.1324       | 0.0249             | -0.0109      | -0.0132           | -0.0021         | -0.1338      |
| 4     | dca   | p5   | -0.1297       | 0.0247             | -0.0114      | -0.0135           | -0.0024         | -0.1323      |
| 4     | mes   | p1   | -0.1517       | 0.0269             | -0.0209      | -0.0129           | -0.0064         | -0.1651      |
| 4     | mes   | p2   | -0.1445       | 0.0261             | -0.0193      | -0.0107           | -0.0052         | -0.1535      |
| 4     | mes   | p3   | -0.1511       | 0.0308             | -0.0210      | -0.0098           | -0.0066         | -0.1577      |
| 4     | ntf2  | p1   | -0.1198       | 0.0147             | -0.0131      | -0.0145           | -0.0024         | -0.1351      |
| 4     | ntf2  | p2   | -0.1174       | 0.0163             | -0.0148      | -0.0119           | -0.0014         | -0.1292      |
| 4     | ntf2  | p3   | -0.1176       | 0.0158             | -0.0122      | -0.0134           | -0.0021         | -0.1296      |
| 4     | ntf2  | p4   | -0.1159       | 0.0168             | -0.0132      | -0.0134           | -0.0027         | -0.1284      |
| 4     | ntf2  | p5   | -0.1157       | 0.0147             | -0.0130      | -0.0111           | -0.0010         | -0.1261      |
| 4     | ntf2  | p6   | -0.1169       | 0.0160             | -0.0143      | -0.0109           | -0.0014         | -0.1274      |
| 4     | pf6   | p1   | -0.1268       | 0.0156             | -0.0122      | -0.0088           | -0.0029         | -0.1351      |
| 4     | pf6   | p2   | -0.1208       | 0.0152             | -0.0111      | -0.0075           | -0.0024         | -0.1266      |
| 4     | pf6   | p3   | -0.1255       | 0.0154             | -0.0116      | -0.0078           | -0.0028         | -0.1323      |
| 4     | tos   | p1   | -0.2225       | 0.0263             | -0.0196      | -0.0122           | -0.0079         | -0.2359      |
| 4     | tos   | p2   | -0.1704       | 0.0250             | -0.0175      | -0.0100           | -0.0075         | -0.1804      |



*S18. EFP Interaction Energies of CnPyr cation and TILA anion using VVO Approximation  
with 6-311++G(d,p) basis set. Units are in Hartree.*

| Chain | Anion | Conf | Electrostatic | Exchange Repulsion | Polarization | Dispersion(6,7,8) | Charge Transfer | Total Energy |
|-------|-------|------|---------------|--------------------|--------------|-------------------|-----------------|--------------|
| 1     | bf4   | p1   | -0.1400       | 0.0189             | -0.0129      | -0.0094           | -0.0008         | -0.1442      |
| 1     | bf4   | p2   | -0.1388       | 0.0186             | -0.0126      | -0.0082           | -0.0008         | -0.1418      |
| 1     | dca   | p1   | -0.1321       | 0.0255             | -0.0125      | -0.0123           | -0.0010         | -0.1324      |
| 1     | dca   | p2   | -0.1344       | 0.0251             | -0.0109      | -0.0131           | -0.0009         | -0.1341      |
| 1     | dca   | p3   | -0.1275       | 0.0241             | -0.0144      | -0.0115           | -0.0012         | -0.1306      |
| 1     | dca   | p4   | -0.1352       | 0.0256             | -0.0104      | -0.0129           | -0.0010         | -0.1338      |
| 1     | mes   | p1   | -0.1569       | 0.0288             | -0.0200      | -0.0117           | -0.0017         | -0.1615      |
| 1     | mes   | p2   | -0.1566       | 0.0326             | -0.0209      | -0.0077           | -0.0021         | -0.1548      |
| 1     | ntf2  | p1   | -0.1245       | 0.0157             | -0.0125      | -0.0134           | -0.0009         | -0.1356      |
| 1     | ntf2  | p2   | -0.1207       | 0.0162             | -0.0143      | -0.0097           | 0.0000          | -0.1285      |
| 1     | ntf2  | p3   | -0.1242       | 0.0181             | -0.0131      | -0.0125           | -0.0011         | -0.1328      |
| 1     | ntf2  | p5   | -0.1227       | 0.0159             | -0.0143      | -0.0099           | 0.0000          | -0.1309      |
| 1     | pf6   | p1   | -0.1307       | 0.0156             | -0.0112      | -0.0083           | -0.0007         | -0.1352      |
| 1     | pf6   | p2   | -0.1298       | 0.0152             | -0.0110      | -0.0074           | -0.0007         | -0.1336      |
| 1     | tos   | p1   | -0.2004       | 0.0277             | -0.0191      | -0.0106           | -0.0017         | -0.2042      |
| 1     | tos   | p2   | -0.1741       | 0.0264             | -0.0204      | -0.0094           | -0.0016         | -0.1792      |
| 2     | bf4   | p1   | -0.1379       | 0.0188             | -0.0135      | -0.0095           | -0.0007         | -0.1429      |
| 2     | bf4   | p2   | -0.1348       | 0.0192             | -0.0125      | -0.0082           | -0.0008         | -0.1371      |
| 2     | bf4   | p3   | -0.1375       | 0.0193             | -0.0132      | -0.0083           | -0.0008         | -0.1405      |
| 2     | dca   | p1   | -0.1297       | 0.0254             | -0.0126      | -0.0124           | -0.0009         | -0.1302      |
| 2     | dca   | p2   | -0.1308       | 0.0243             | -0.0106      | -0.0131           | -0.0010         | -0.1313      |
| 2     | dca   | p3   | -0.1322       | 0.0251             | -0.0111      | -0.0133           | -0.0009         | -0.1324      |
| 2     | mes   | p1   | -0.1542       | 0.0280             | -0.0205      | -0.0123           | -0.0016         | -0.1605      |
| 2     | mes   | p2   | -0.1489       | 0.0266             | -0.0186      | -0.0105           | -0.0016         | -0.1529      |
| 2     | mes   | p3   | -0.1545       | 0.0309             | -0.0206      | -0.0093           | -0.0020         | -0.1556      |
| 2     | ntf2  | p1   | -0.1212       | 0.0143             | -0.0122      | -0.0138           | 0.0000          | -0.1329      |
| 2     | ntf2  | p2   | -0.1184       | 0.0170             | -0.0145      | -0.0103           | -0.0006         | -0.1268      |
| 2     | ntf2  | p3   | -0.1189       | 0.0145             | -0.0115      | -0.0131           | -0.0007         | -0.1296      |
| 2     | ntf2  | p4   | -0.1230       | 0.0167             | -0.0130      | -0.0126           | -0.0010         | -0.1328      |
| 2     | ntf2  | p5   | -0.1182       | 0.0153             | -0.0130      | -0.0109           | -0.0005         | -0.1274      |
| 2     | ntf2  | p6   | -0.1182       | 0.0157             | -0.0144      | -0.0099           | 0.0000          | -0.1267      |
| 2     | pf6   | p1   | -0.1290       | 0.0166             | -0.0115      | -0.0082           | 0.0000          | -0.1321      |
| 2     | pf6   | p2   | -0.1249       | 0.0156             | -0.0107      | -0.0074           | -0.0007         | -0.1281      |
| 2     | pf6   | p3   | -0.1284       | 0.0155             | -0.0113      | -0.0075           | -0.0007         | -0.1324      |
| 2     | tos   | p1   | -0.1753       | 0.0272             | -0.0194      | -0.0112           | -0.0017         | -0.1804      |
| 2     | tos   | p2   | -0.1869       | 0.0257             | -0.0178      | -0.0096           | -0.0015         | -0.1902      |
| 3     | bf4   | p1   | -0.1364       | 0.0184             | -0.0139      | -0.0097           | -0.0006         | -0.1422      |
| 3     | bf4   | p2   | -0.1336       | 0.0184             | -0.0129      | -0.0082           | -0.0008         | -0.1370      |
| 3     | bf4   | p3   | -0.1365       | 0.0192             | -0.0133      | -0.0085           | -0.0008         | -0.1399      |
| 3     | dca   | p1   | -0.1283       | 0.0254             | -0.0118      | -0.0130           | -0.0008         | -0.1284      |
| 3     | dca   | p2   | -0.1303       | 0.0241             | -0.0109      | -0.0132           | -0.0009         | -0.1313      |
| 3     | dca   | p3   | -0.1220       | 0.0207             | -0.0123      | -0.0110           | -0.0009         | -0.1255      |
| 3     | dca   | p4   | -0.1279       | 0.0255             | -0.0128      | -0.0146           | -0.0007         | -0.1304      |
| 3     | dca   | p5   | -0.1312       | 0.0263             | -0.0126      | -0.0153           | -0.0008         | -0.1336      |
| 3     | mes   | p1   | -0.1517       | 0.0270             | -0.0206      | -0.0128           | -0.0014         | -0.1596      |
| 3     | mes   | p2   | -0.1476       | 0.0263             | -0.0190      | -0.0104           | -0.0015         | -0.1521      |
| 3     | mes   | p3   | -0.1526       | 0.0308             | -0.0207      | -0.0096           | -0.0018         | -0.1540      |
| 3     | ntf2  | p1   | -0.1208       | 0.0144             | -0.0127      | -0.0144           | 0.0000          | -0.1335      |
| 3     | ntf2  | p2   | -0.1162       | 0.0177             | -0.0144      | -0.0098           | 0.0000          | -0.1227      |
| 3     | ntf2  | p3   | -0.1181       | 0.0149             | -0.0117      | -0.0131           | -0.0007         | -0.1288      |
| 3     | ntf2  | p4   | -0.1181       | 0.0168             | -0.0131      | -0.0131           | -0.0009         | -0.1284      |
| 3     | ntf2  | p5   | -0.1184       | 0.0149             | -0.0129      | -0.0108           | 0.0000          | -0.1273      |
| 3     | ntf2  | p6   | -0.1162       | 0.0160             | -0.0140      | -0.0104           | 0.0000          | -0.1246      |
| 3     | pf6   | p1   | -0.1277       | 0.0155             | -0.0119      | -0.0088           | -0.0006         | -0.1335      |
| 3     | pf6   | p2   | -0.1232       | 0.0152             | -0.0109      | -0.0073           | -0.0006         | -0.1268      |
| 3     | pf6   | p3   | -0.1267       | 0.0155             | -0.0114      | -0.0077           | 0.0000          | -0.1303      |
| 3     | tos   | p1   | -0.1864       | 0.0263             | -0.0207      | -0.0120           | -0.0014         | -0.1942      |
| 3     | tos   | p2   | -0.1795       | 0.0253             | -0.0183      | -0.0095           | -0.0014         | -0.1836      |
| 4     | bf4   | p1   | -0.1361       | 0.0184             | -0.0142      | -0.0098           | -0.0006         | -0.1423      |
| 4     | bf4   | p2   | -0.1313       | 0.0184             | -0.0133      | -0.0083           | -0.0007         | -0.1352      |
| 4     | bf4   | p3   | -0.1359       | 0.0195             | -0.0136      | -0.0086           | -0.0008         | -0.1394      |
| 4     | dca   | p1   | -0.1271       | 0.0226             | -0.0112      | -0.0127           | 0.0000          | -0.1283      |
| 4     | dca   | p2   | -0.1280       | 0.0239             | -0.0110      | -0.0132           | -0.0009         | -0.1293      |
| 4     | dca   | p3   | -0.1281       | 0.0243             | -0.0119      | -0.0134           | -0.0006         | -0.1297      |
| 4     | dca   | p4   | -0.1324       | 0.0249             | -0.0109      | -0.0132           | -0.0009         | -0.1326      |
| 4     | dca   | p5   | -0.1297       | 0.0247             | -0.0114      | -0.0135           | -0.0008         | -0.1307      |
| 4     | mes   | p1   | -0.1517       | 0.0269             | -0.0209      | -0.0129           | -0.0014         | -0.1601      |
| 4     | mes   | p2   | -0.1445       | 0.0261             | -0.0193      | -0.0107           | -0.0015         | -0.1498      |
| 4     | mes   | p3   | -0.1511       | 0.0308             | -0.0210      | -0.0098           | -0.0019         | -0.1530      |
| 4     | ntf2  | p1   | -0.1198       | 0.0147             | -0.0131      | -0.0145           | 0.0000          | -0.1327      |
| 4     | ntf2  | p2   | -0.1174       | 0.0163             | -0.0148      | -0.0119           | 0.0000          | -0.1278      |
| 4     | ntf2  | p3   | -0.1176       | 0.0158             | -0.0122      | -0.0134           | -0.0008         | -0.1282      |
| 4     | ntf2  | p4   | -0.1159       | 0.0168             | -0.0132      | -0.0134           | -0.0009         | -0.1267      |
| 4     | ntf2  | p5   | -0.1157       | 0.0147             | -0.0130      | -0.0111           | 0.0000          | -0.1251      |
| 4     | ntf2  | p6   | -0.1169       | 0.0160             | -0.0143      | -0.0109           | 0.0000          | -0.1260      |
| 4     | pf6   | p1   | -0.1268       | 0.0156             | -0.0122      | -0.0088           | -0.0006         | -0.1328      |
| 4     | pf6   | p2   | -0.1208       | 0.0152             | -0.0111      | -0.0075           | -0.0006         | -0.1248      |
| 4     | pf6   | p3   | -0.1255       | 0.0154             | -0.0116      | -0.0078           | 0.0000          | -0.1295      |
| 4     | tos   | p1   | -0.2225       | 0.0263             | -0.0196      | -0.0122           | -0.0014         | -0.2295      |
| 4     | tos   | p2   | -0.1704       | 0.0250             | -0.0175      | -0.0100           | -0.0017         | -0.1746      |

*S19. EFP Interaction Energies of CnPyr cation and halide anion using canonical molecular orbitals with 6-311++G(d,p) basis set. Units are in Hartree.*

| Chain | Anion | Conf | Electrostatic | Exchange Repulsion | Polarization | Dispersion(6,7,8) | Charge Transfer | Total Energy |
|-------|-------|------|---------------|--------------------|--------------|-------------------|-----------------|--------------|
| 1     | br    | p1   | -0.1531       | 0.0585             | -0.0299      | -0.0131           | -0.0081         | -0.1457      |
| 1     | br    | p2   | -0.1541       | 0.0561             | -0.0291      | -0.0119           | -0.0054         | -0.1443      |
| 1     | cl    | p1   | -0.1570       | 0.0491             | -0.0249      | -0.0051           | -0.0112         | -0.1491      |
| 1     | cl    | p2   | -0.1576       | 0.0511             | -0.0206      | -0.0053           | -0.0082         | -0.1406      |
| 2     | br    | p1   | -0.1513       | 0.0571             | -0.0340      | -0.0135           | -0.0086         | -0.1503      |
| 2     | br    | p2   | -0.1469       | 0.0531             | -0.0327      | -0.0115           | -0.0047         | -0.1427      |
| 2     | br    | p3   | -0.1520       | 0.0560             | -0.0310      | -0.0118           | -0.0043         | -0.1431      |
| 2     | cl    | p1   | -0.1544       | 0.0523             | -0.0213      | -0.0059           | -0.0119         | -0.1411      |
| 2     | cl    | p2   | -0.1500       | 0.0491             | -0.0217      | -0.0050           | -0.0090         | -0.1365      |
| 2     | cl    | p3   | -0.1548       | 0.0502             | -0.0221      | -0.0048           | -0.0088         | -0.1403      |
| 3     | br    | p1   | -0.1498       | 0.0587             | -0.0294      | -0.0135           | -0.0088         | -0.1428      |
| 3     | br    | p2   | -0.1474       | 0.0559             | -0.0262      | -0.0127           | -0.0026         | -0.1330      |
| 3     | br    | p3   | -0.1495       | 0.0543             | -0.0322      | -0.0122           | -0.0035         | -0.1431      |
| 3     | cl    | p1   | -0.1527       | 0.0513             | -0.0227      | -0.0056           | -0.0113         | -0.1411      |
| 3     | cl    | p2   | -0.1496       | 0.0490             | -0.0217      | -0.0047           | -0.0087         | -0.1357      |
| 3     | cl    | p3   | -0.1531       | 0.0501             | -0.0214      | -0.0052           | -0.0085         | -0.1381      |
| 4     | br    | p1   | -0.1486       | 0.0564             | -0.0355      | -0.0133           | -0.0091         | -0.1502      |
| 4     | br    | p2   | -0.1428       | 0.0556             | -0.0267      | -0.0128           | -0.0029         | -0.1297      |
| 4     | br    | p3   | -0.1480       | 0.0534             | -0.0332      | -0.0122           | -0.0071         | -0.1471      |
| 4     | cl    | p1   | -0.1525       | 0.0511             | -0.0223      | -0.0059           | -0.0115         | -0.1410      |
| 4     | cl    | p2   | -0.1473       | 0.0470             | -0.0246      | -0.0046           | -0.0087         | -0.1382      |
| 4     | cl    | p3   | -0.1525       | 0.0499             | -0.0219      | -0.0050           | -0.0093         | -0.1388      |

*S20. EFP Interaction Energies of CnPyr cation and halide anion using VVO Approximation with 6-311++G(d,p) basis set. Units are in Hartree.*

| Chain | Anion | Conf | Electrostatic | Exchange Repulsion | Polarization | Dispersion(6,7,8) | Charge Transfer | Total Energy |
|-------|-------|------|---------------|--------------------|--------------|-------------------|-----------------|--------------|
| 1     | br    | p1   | -0.1531       | 0.0585             | -0.0299      | -0.0131           | -0.0022         | -0.1398      |
| 1     | br    | p2   | -0.1541       | 0.0561             | -0.0291      | -0.0119           | -0.0019         | -0.1408      |
| 1     | cl    | p1   | -0.1570       | 0.0491             | -0.0249      | -0.0051           | -0.0019         | -0.1399      |
| 1     | cl    | p2   | -0.1576       | 0.0511             | -0.0206      | -0.0053           | -0.0017         | -0.1341      |
| 2     | br    | p1   | -0.1513       | 0.0571             | -0.0340      | -0.0135           | -0.0021         | -0.1437      |
| 2     | br    | p2   | -0.1469       | 0.0531             | -0.0327      | -0.0115           | -0.0019         | -0.1398      |
| 2     | br    | p3   | -0.1520       | 0.0560             | -0.0310      | -0.0118           | -0.0018         | -0.1406      |
| 2     | cl    | p1   | -0.1544       | 0.0523             | -0.0213      | -0.0059           | -0.0019         | -0.1311      |
| 2     | cl    | p2   | -0.1500       | 0.0491             | -0.0217      | -0.0050           | -0.0017         | -0.1293      |
| 2     | cl    | p3   | -0.1548       | 0.0502             | -0.0221      | -0.0048           | -0.0016         | -0.1331      |
| 3     | br    | p1   | -0.1498       | 0.0587             | -0.0294      | -0.0135           | -0.0017         | -0.1357      |
| 3     | br    | p2   | -0.1474       | 0.0559             | -0.0262      | -0.0127           | -0.0015         | -0.1319      |
| 3     | br    | p3   | -0.1495       | 0.0543             | -0.0322      | -0.0122           | -0.0016         | -0.1412      |
| 3     | cl    | p1   | -0.1527       | 0.0513             | -0.0227      | -0.0056           | -0.0015         | -0.1313      |
| 3     | cl    | p2   | -0.1496       | 0.0490             | -0.0217      | -0.0047           | -0.0015         | -0.1285      |
| 3     | cl    | p3   | -0.1531       | 0.0501             | -0.0214      | -0.0052           | -0.0015         | -0.1311      |
| 4     | br    | p1   | -0.1486       | 0.0564             | -0.0355      | -0.0133           | -0.0016         | -0.1427      |
| 4     | br    | p2   | -0.1428       | 0.0556             | -0.0267      | -0.0128           | -0.0016         | -0.1283      |
| 4     | br    | p3   | -0.1480       | 0.0534             | -0.0332      | -0.0122           | -0.0017         | -0.1417      |
| 4     | cl    | p1   | -0.1525       | 0.0511             | -0.0223      | -0.0059           | -0.0014         | -0.1309      |
| 4     | cl    | p2   | -0.1473       | 0.0470             | -0.0246      | -0.0046           | -0.0016         | -0.1312      |
| 4     | cl    | p3   | -0.1525       | 0.0499             | -0.0219      | -0.0050           | -0.0015         | -0.1311      |
